# Supplementary material for: Structure–activity relationship of conformationally constrained peptidomimetics for antiproliferative activity in HER2-overexpressing breast cancer cell lines
Source: Royal Society of Chemistry journal article supplement (doi:10.1039/c1md00126d), 2011-01-01
Supplement: c1md00126d.pdf [file c1md00126d.pdf]

## Supplementary material

**Table S1:** Analytical data for compounds used in the study.

| Code         | Compound                                                                                                              | Experimental<br>Molecular<br>weight | HPLC<br>peak<br>( min) | Purity<br>% |
|--------------|-----------------------------------------------------------------------------------------------------------------------|-------------------------------------|------------------------|-------------|
| <b>5</b>     | H-Arg-[3-amino-3(1-naphthyl)-propionic acid]-Phe-OH                                                                   | 519.4                               | 14.55                  | 99          |
| <b>6(S)</b>  | H-Arg-[3-amino-3(1-naphthyl)-propionic acid]-Tyr-OH                                                                   | 535.3                               | 11.58                  | 98          |
| <b>6(R)</b>  | H-Arg-[3-amino-3(1-naphthyl)-propionic acid]-Tyr-OH                                                                   | 535.3                               | 10.0                   | 99          |
| <b>7(S)</b>  | H-Arg-[3-amino-3(1-naphthyl)-propionic acid]-Asp-OH                                                                   | 487.2                               | 11.68                  | 96          |
| <b>7(R)</b>  | H-Arg-[3-amino-3(1-naphthyl)-propionic acid]-Asp-OH                                                                   | 487.3                               | 13.53                  | 93          |
| <b>8(S)</b>  | H-Arg-[3-amino-3(1-naphthyl)-propionic acid]-[3-amino-3(1-naphthyl)-propionic acid]-OH                                | 569                                 | 5.02                   | 95          |
| <b>9(S)</b>  | H-Arg-[3-amino-3(1-naphthyl)-propionic acid]-Phe-Asp-OH                                                               | 636                                 | 7.88                   | 99          |
| <b>10(S)</b> | H-Arg-[3-amino-3(biphenyl)-propionic acid]-Phe-OH                                                                     | 545.3                               | 12.93                  | 99          |
| <b>10(R)</b> | H-Arg-[3-amino-3(biphenyl)-propionic acid]-Phe-OH                                                                     | 545.3                               | 14.10                  | 98          |
| <b>11(S)</b> | H-Lys-[3-amino-3(biphenyl)-propionic acid]-Phe-OH                                                                     | 517.2                               | 14.583                 | 98          |
| <b>11(R)</b> | H-Lys-[3-amino-3(biphenyl)-propionic acid]-Phe-OH                                                                     | 517.2                               | 15.42                  | 98          |
| <b>12(S)</b> | H-Arg-Pro-[3-amino-3(1-naphthyl)-propionic acid]-Phe-OH                                                               | 615.34                              | 8.92                   | 98          |
| <b>12(R)</b> | H-Arg-Pro-[3-amino-3(1-naphthyl)-propionic acid]-Phe-OH                                                               | 615.28                              | 12.92                  | 98          |
| <b>13(S)</b> | H-Arg-Pro-[3-amino-3(1-naphthyl)-propionic acid]-Tyr-OH                                                               | 632.6                               | 11.27                  | 96          |
| <b>13(R)</b> | H-Arg-Pro-[3-amino-3(1-naphthyl)-propionic acid]-Tyr-OH                                                               | 632.5                               | 12.08                  | 95          |
| <b>14(S)</b> | Cyclo (1,4) Arg <sup>1</sup> -Pro <sup>2</sup> -[3-amino-3(1-naphthyl)-propionic acid] <sup>3</sup> -Phe <sup>4</sup> | 597.88                              | 11.15                  | 96          |
| <b>15(S)</b> | Cyclo (1,5) Arg <sup>1</sup> -Pro <sup>2</sup> -[3-amino-3(1-naphthyl)-propionic acid] <sup>3</sup> -Phe <sup>4</sup> | 862.98                              | 14.88                  | 98          |

|               |                                                                         |        |       |    |
|---------------|-------------------------------------------------------------------------|--------|-------|----|
|               | acid] <sup>3</sup> -Phe <sup>4</sup> -DBF <sup>5</sup>                  |        |       |    |
| <b>16(S)</b>  | Ac- Arg-[3-amino-3(1-naphthyl)-propionic acid]-Phe-NH <sub>2</sub>      | 560.4  | 16.13 | 99 |
| <b>16(R)</b>  | Ac- Arg-[3-amino-3(1-naphthyl)-propionic acid]-Phe-NH <sub>2</sub>      | 560.3  | 19.53 | 99 |
| <b>17(S)</b>  | H-Arg-[3-amino-3(1-naphthyl)-propionic acid]-Phe-Cys-OH                 | 622.3  | 15.83 | 97 |
| <b>17(R)</b>  | H-Arg-[3-amino-3(1-naphthyl)-propionic acid]-Phe-Cys-OH                 | 622.4  | 18.60 | 96 |
| <b>FITC-5</b> | FITC-Aminocaproicacid-Arg-[3-amino-3(1-naphthyl)-propionic acid]-Phe-OH | 1020.9 | 13.92 | 95 |

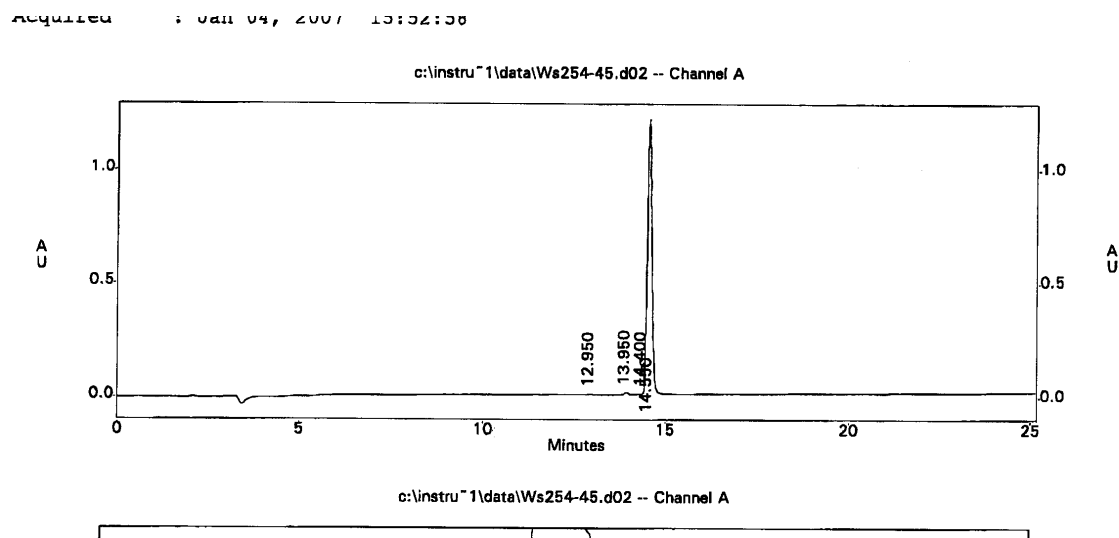

**Fig. 1. HPLC of compound 5**

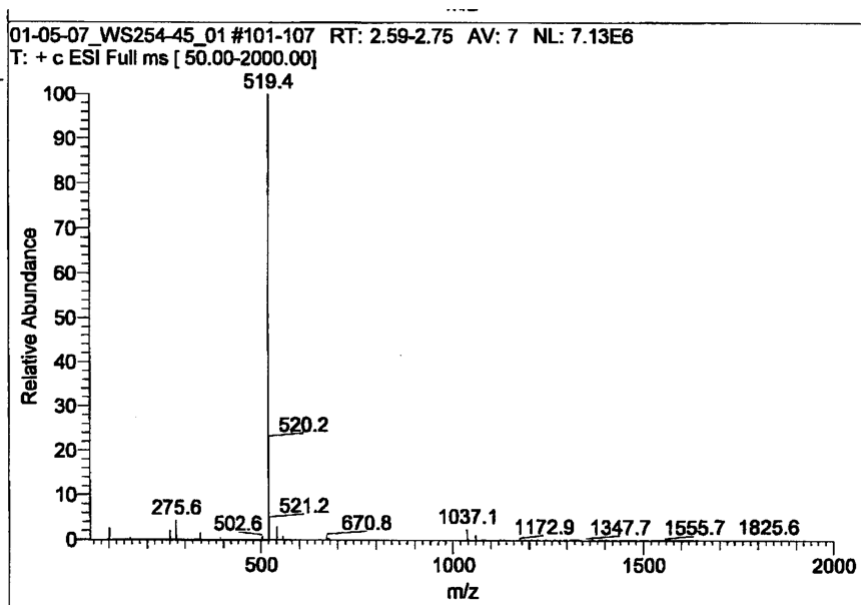

Fig. 2. Mass Spectrum of compound 5

Sample ID: AAF131 // 287095-11(11-12) in ACN/H2O  
System: BECKMAN  
Column: YMC C18, 4.6 X 250mm 60°C  
Solvent: A=0.1%TFA/H2O, B=0.1%TFA/ACN  
Flow: 1ml/min  
Detector: 215nm  
Method: C:\32Karat\Projects\Default\Method\35-65%B in 30 min.met  
Filename: C:\32Karat\Projects\Default\Data\HPLC 1\AAF131.D113.dat  
Acquisition Date: 9/20/2010 9:06:50 AM

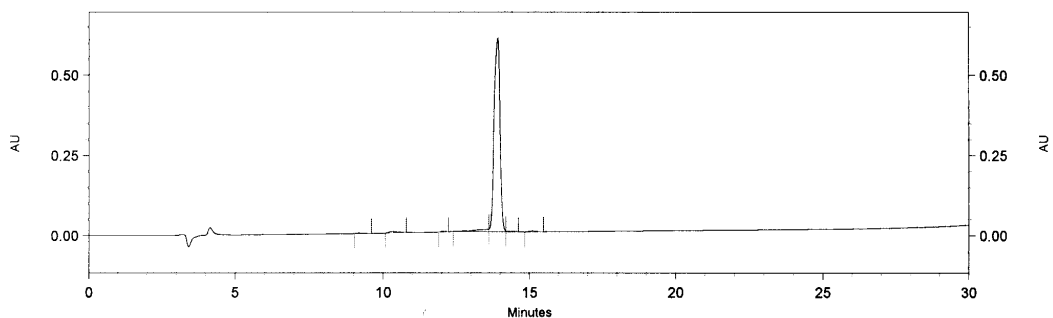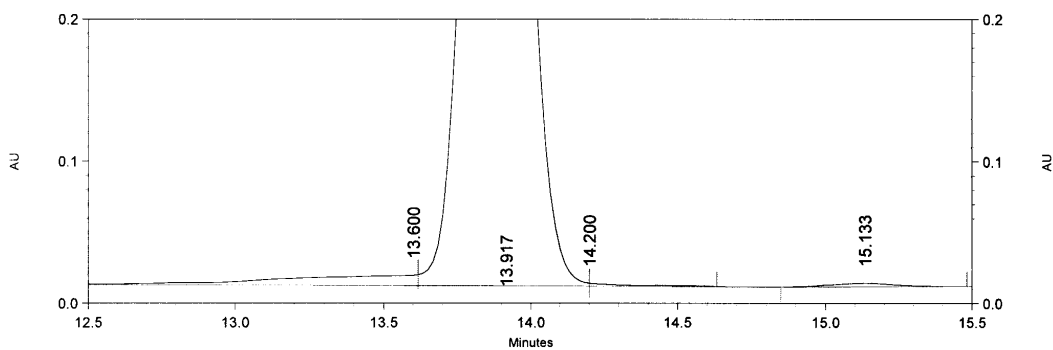

Det 166  
Results

| Pk #   | Retention Time | Area    | Area Percent | Height |
|--------|----------------|---------|--------------|--------|
| 1      | 9.18           | 16990   | 0.19         | 1166   |
| 2      | 10.33          | 85597   | 0.97         | 4114   |
| 3      | 12.08          | 14753   | 0.17         | 1269   |
| 4      | 13.60          | 240568  | 2.74         | 7238   |
| 5      | 13.92          | 8381756 | 95.29        | 602994 |
| 6      | 14.20          | 18650   | 0.21         | 2001   |
| 7      | 15.13          | 37571   | 0.43         | 2462   |
| Totals |                | 8795885 | 100.00       | 621244 |

Fig. 3. HPLC of FITC-5



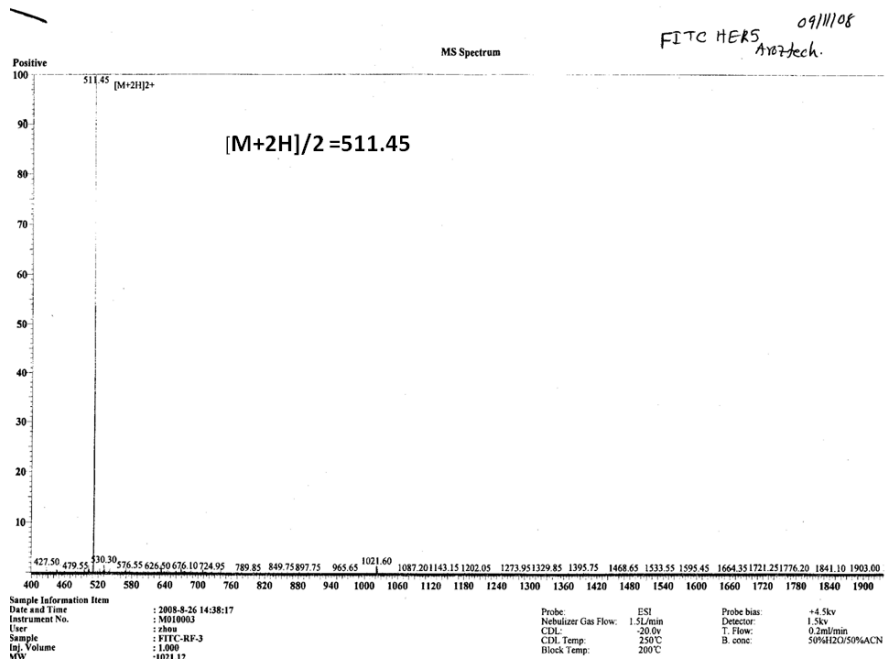

Fig. 4. Mass Spectrum of FITC-5

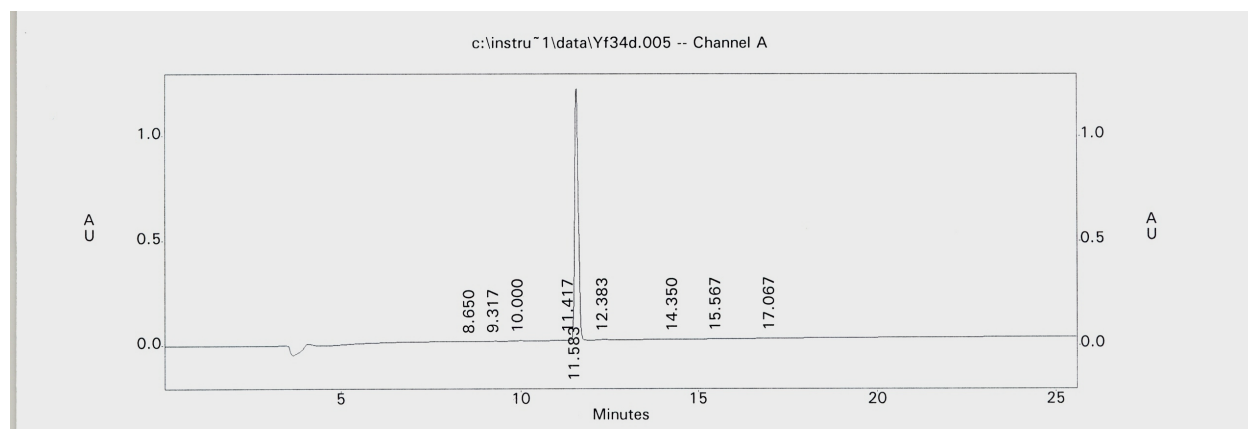

Fig. 5. HPLC of compound 6(S)

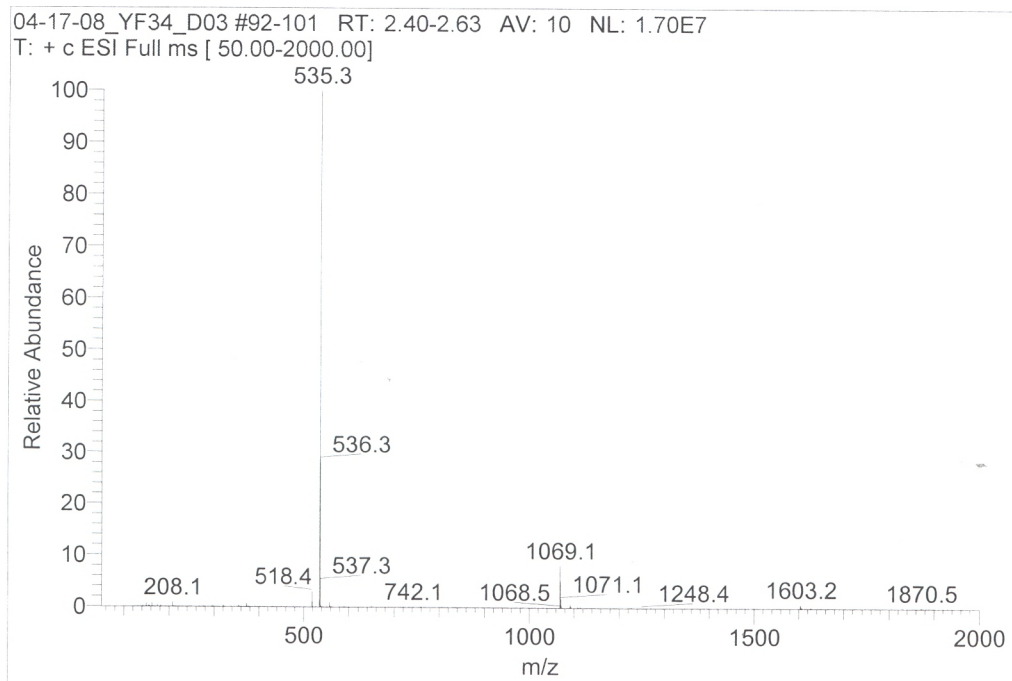

**Fig 6. Mass spectrum of compound 6(S)**

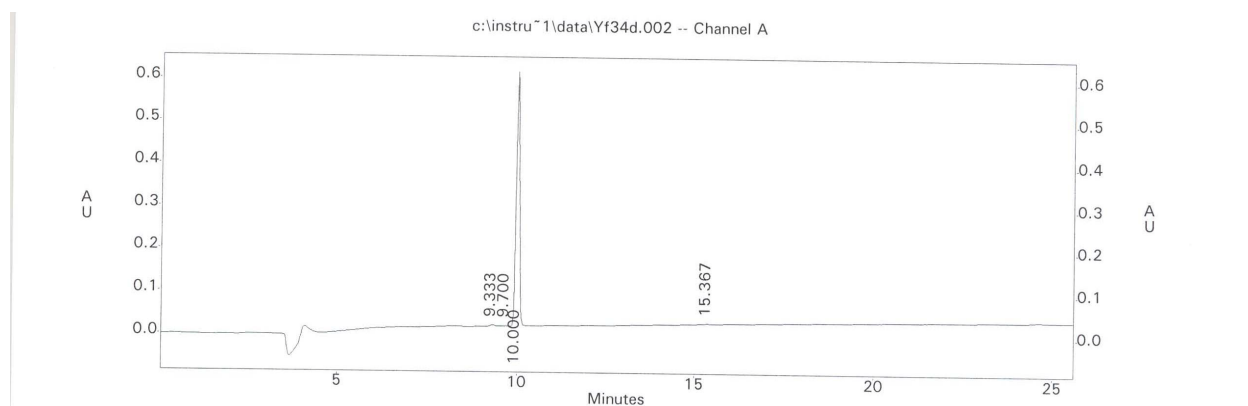

**Fig. 7. HPLC of compound 6(R)**

04-17-08\_YF34\_D01 #86-96 RT: 2.23-2.48 AV: 11 NL: 2.82E7  
T: + c ESI Full ms [ 50.00-2000.00]

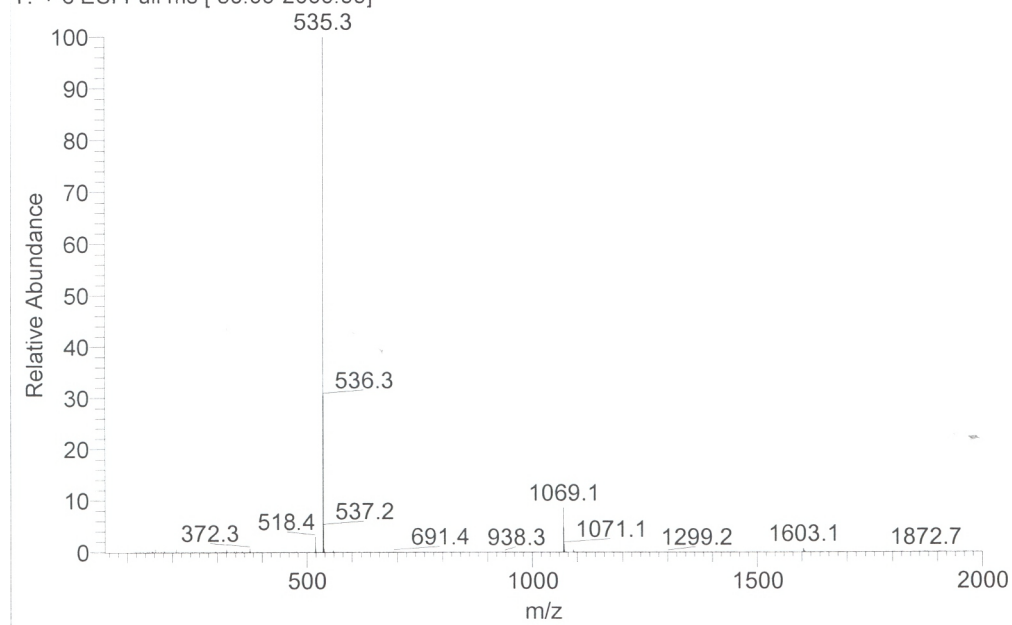

**Fig. 8. Mass spectrum of compound 6(R)**

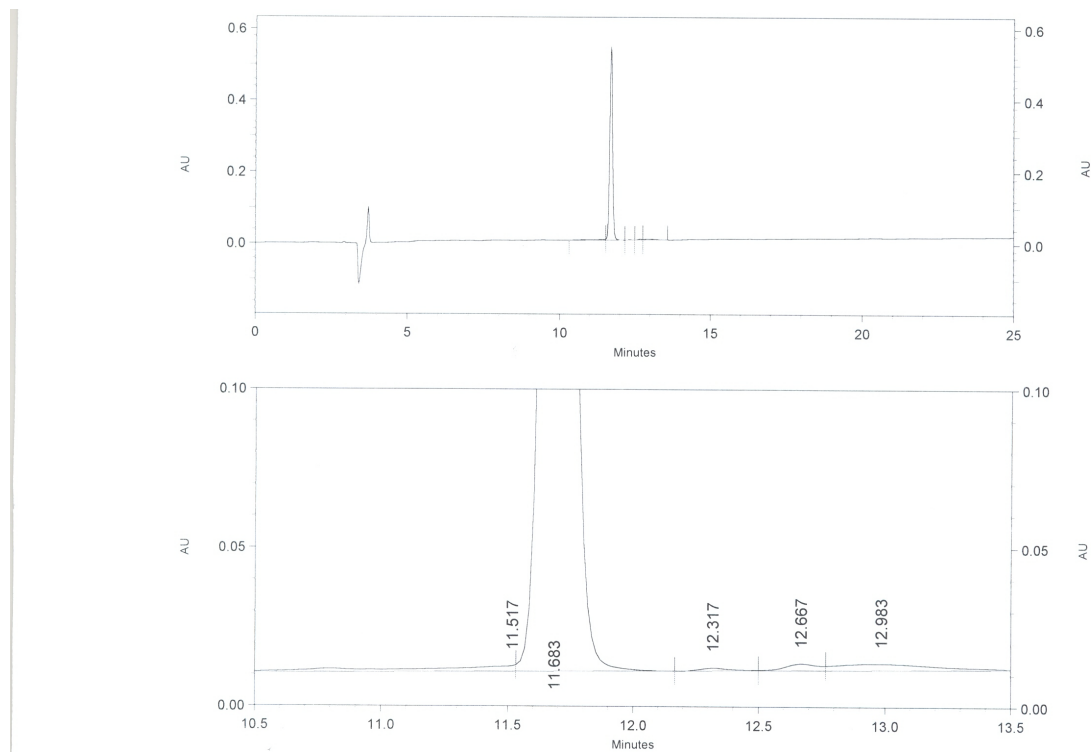

**Fig. 9. HPLC of compound 7(S)**

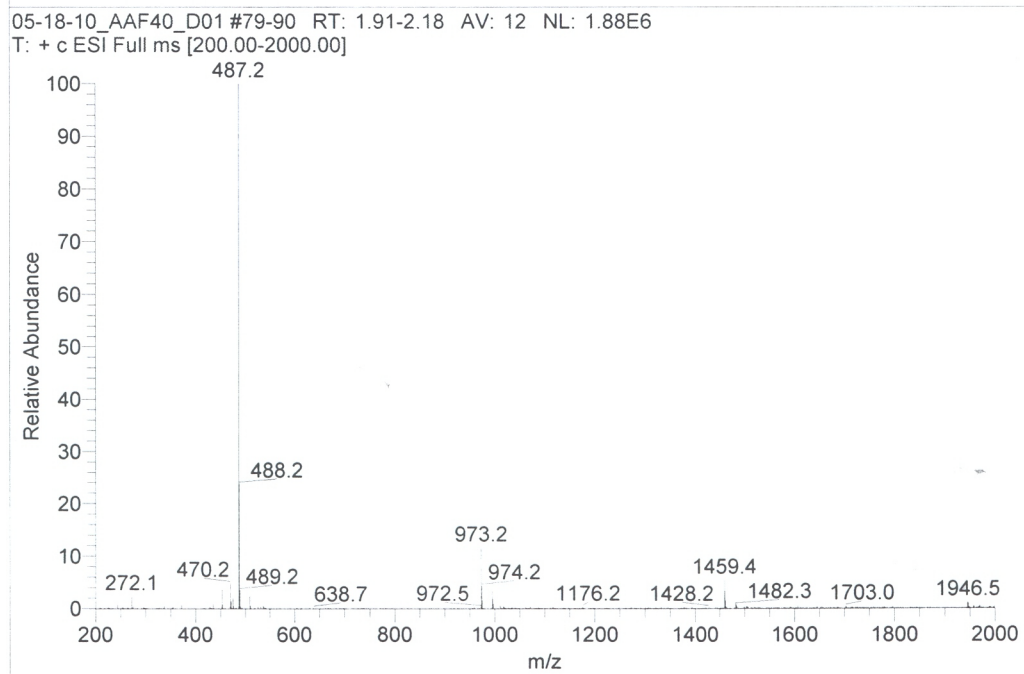

**Fig. 10. Mass spectrum of compound 7(S)**

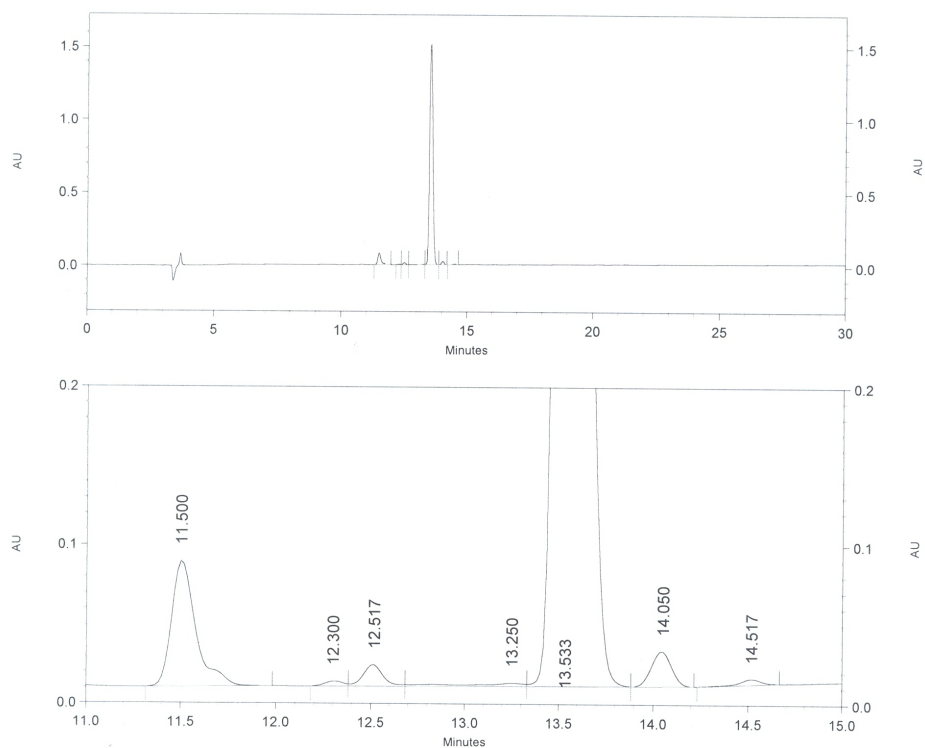

**Fig. 11. HPLC of compound 7(R)**

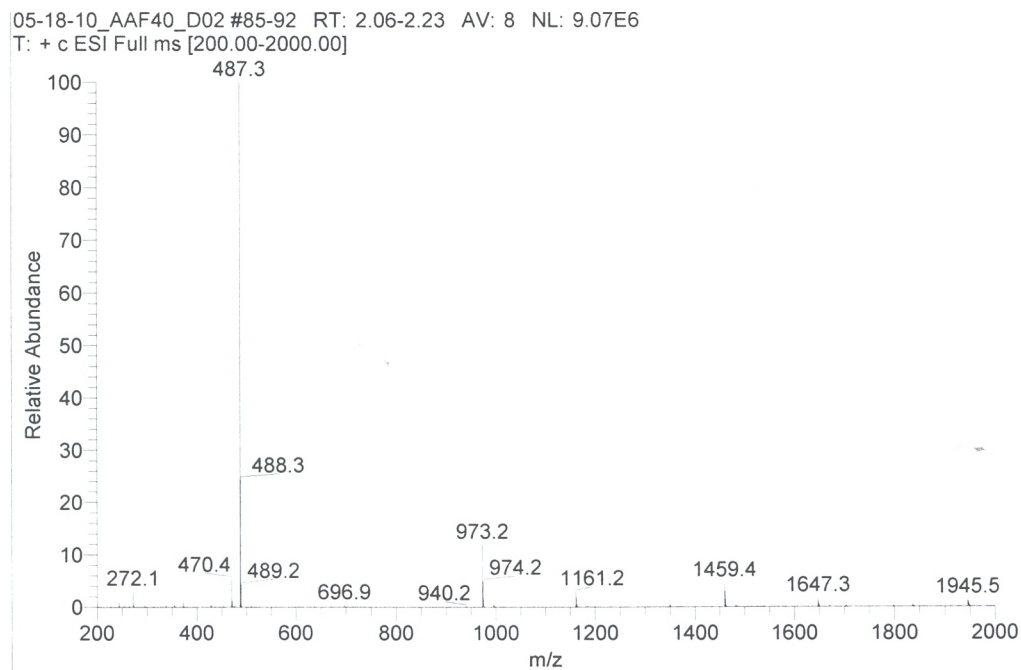

**Fig. 12. Mass spectrum of compound 7(R)**

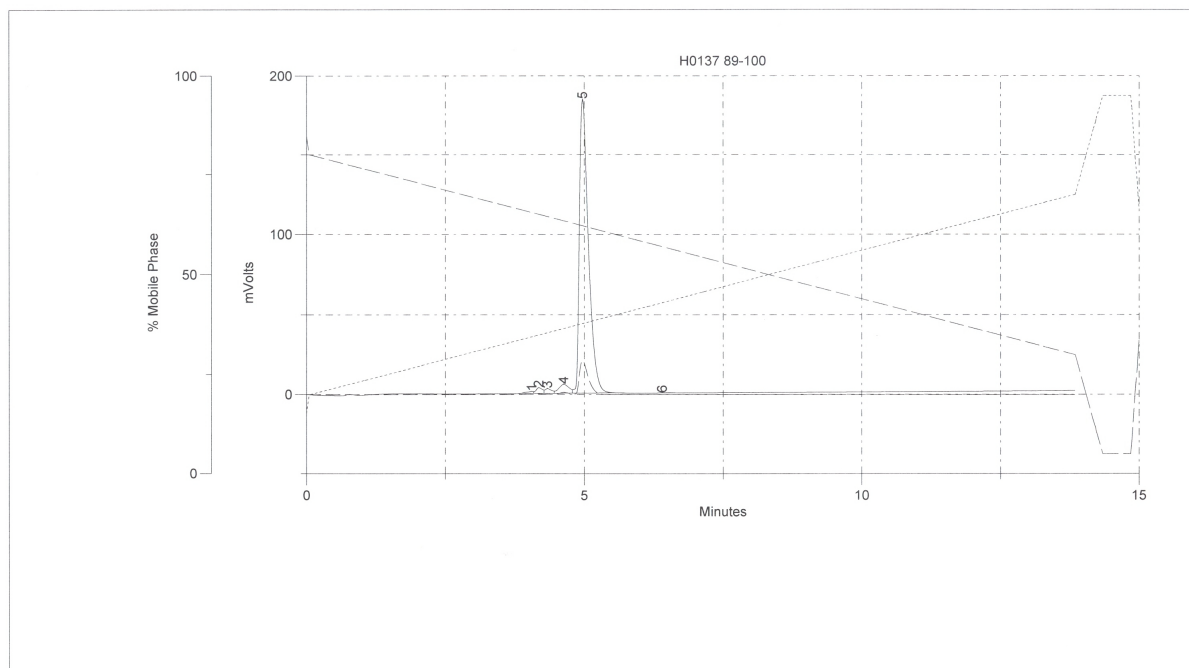

**Fig. 13. HPLC of compound 8(S)**

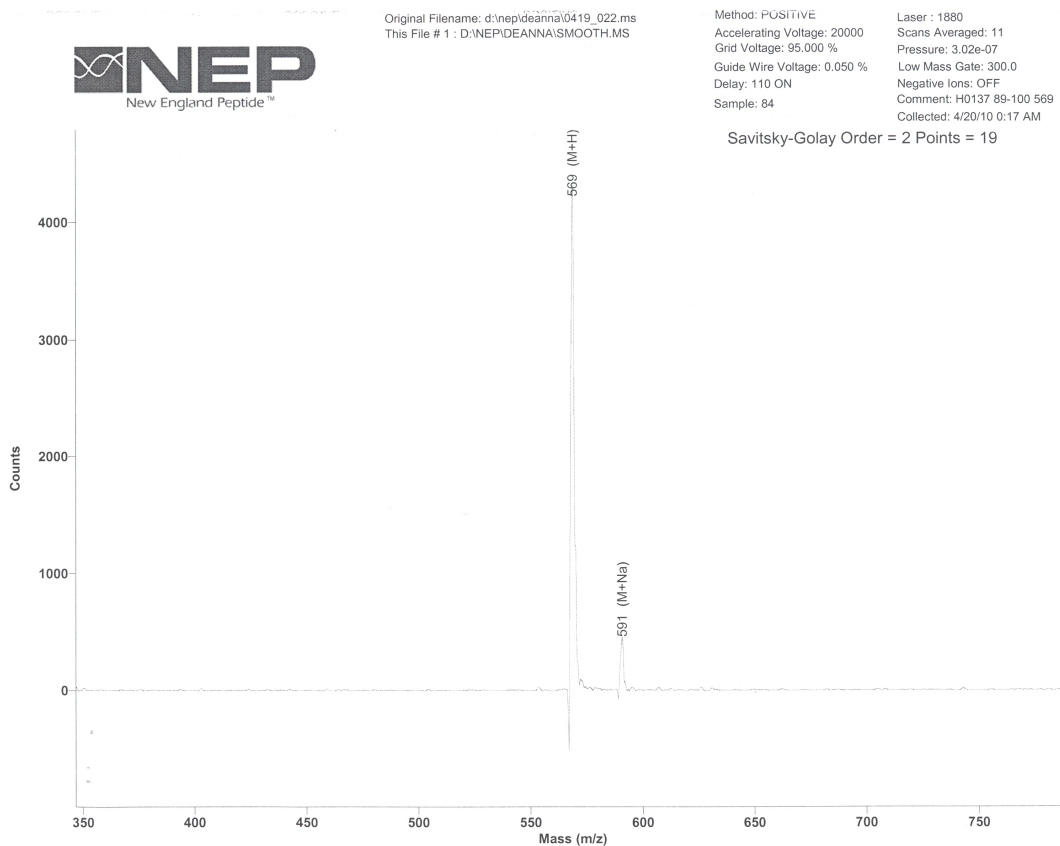

**Fig. 14. Mass spectrum of compound 8(S)**

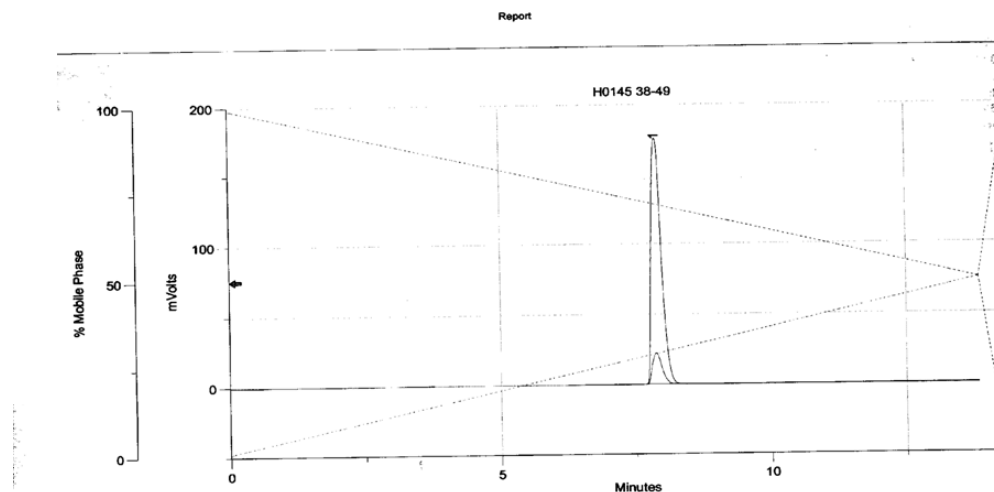

Fig. 15. HPLC of 9 compound (S)

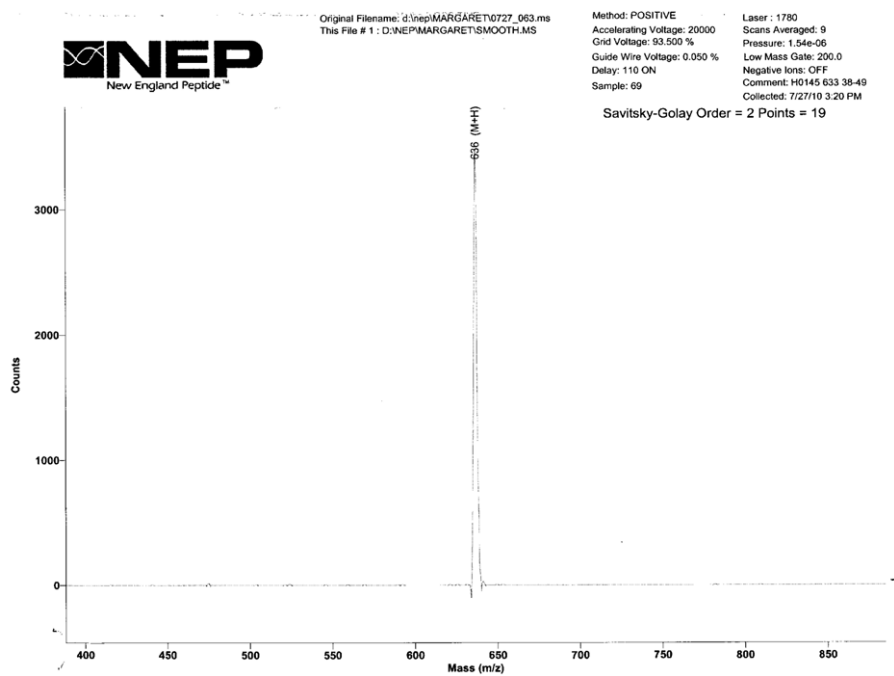

Fig. 16. Mass spectrum of compound 9(S)

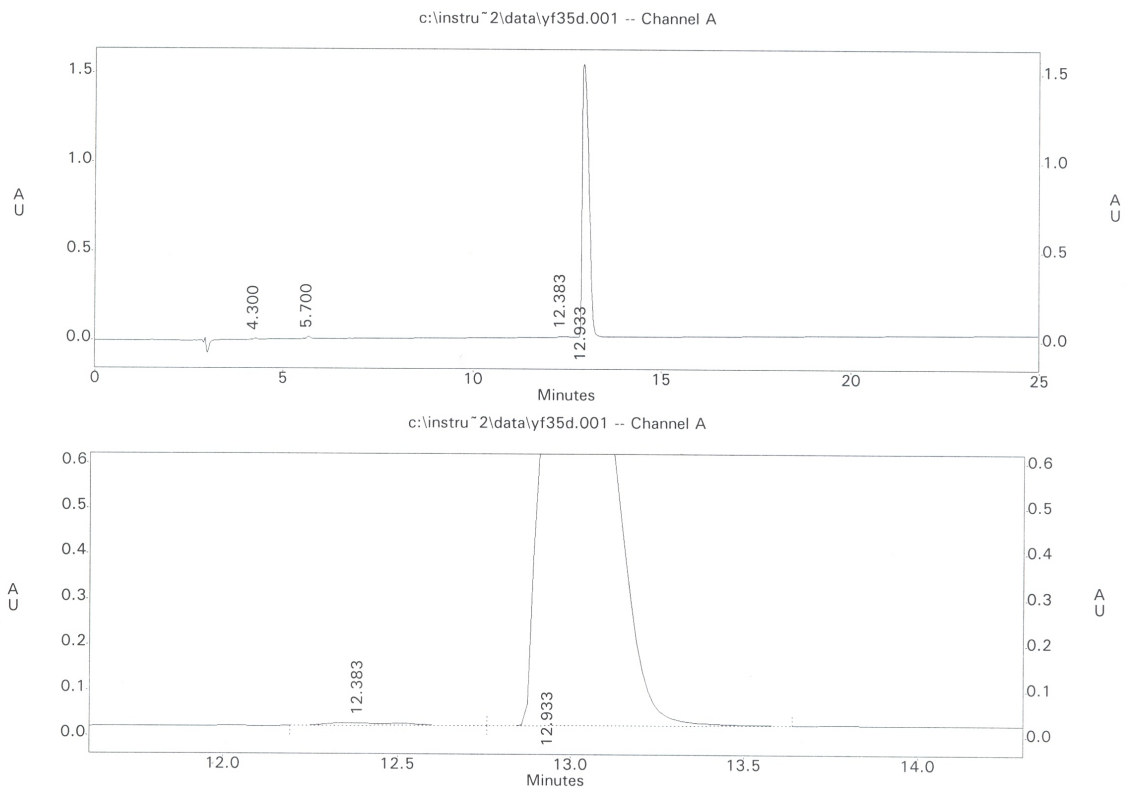

**Fig. 17. HPLC of compound 10(S)**

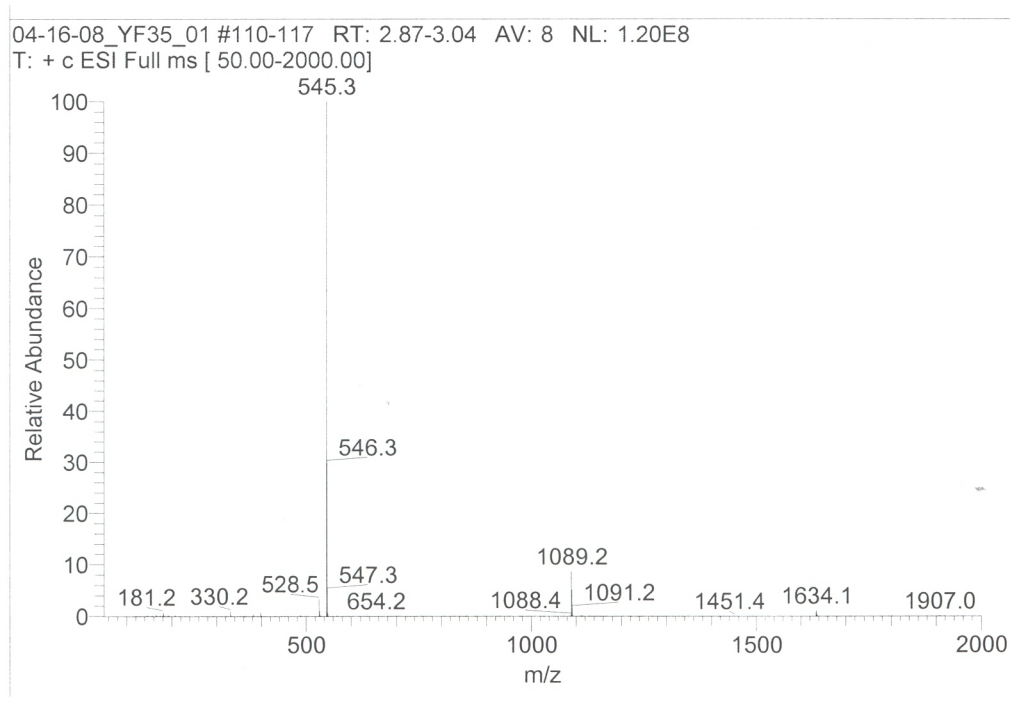

**Fig. 18. Mass spectrum of compound 10(S)**



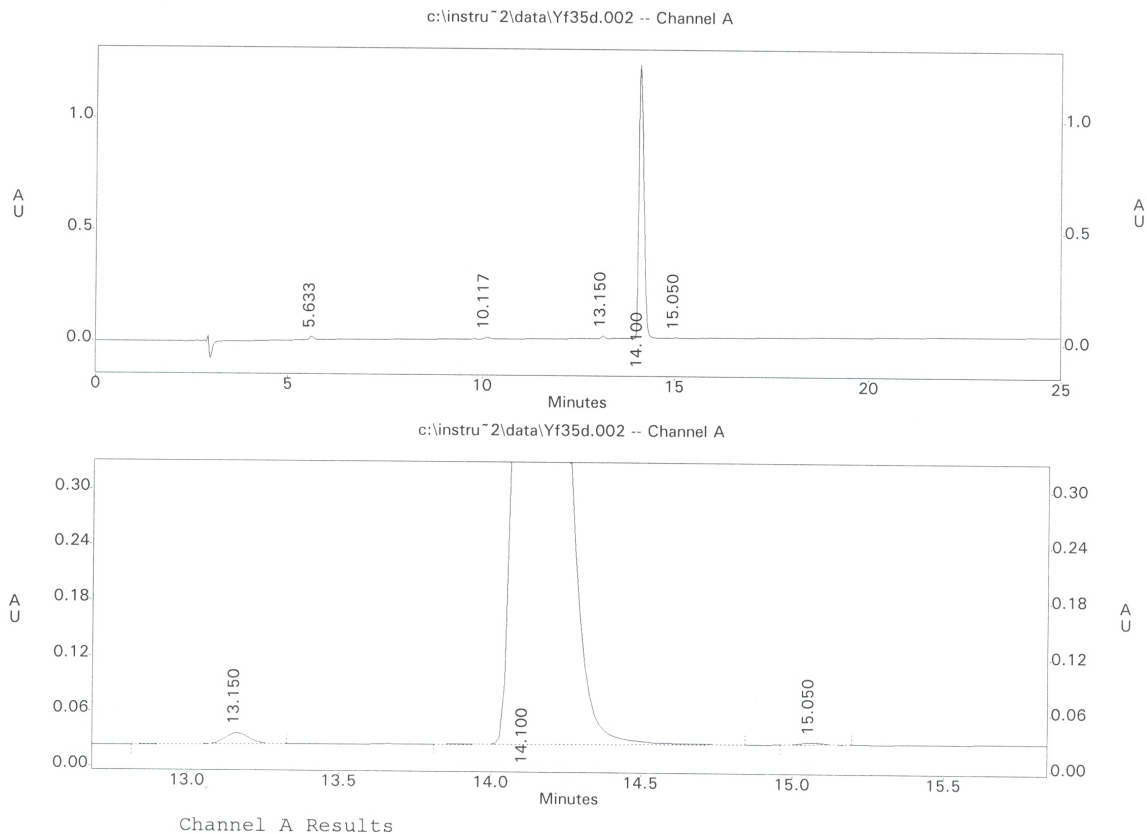

**Fig. 19. HPLC of compound 10(R)**

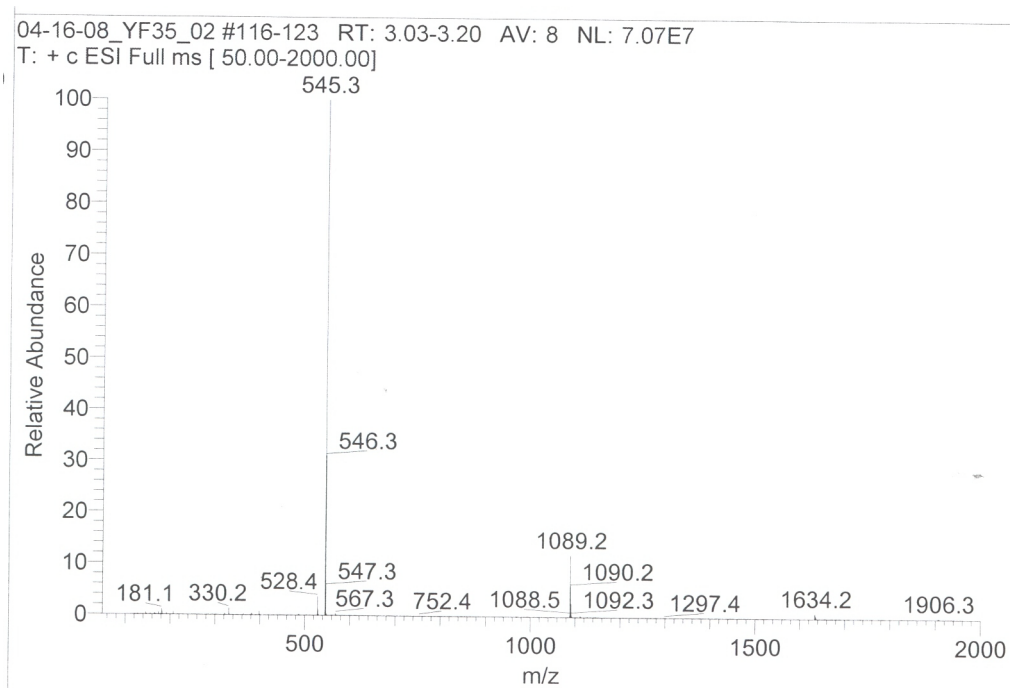

**Fig. 20. Mass spectrum of compound 10(R)**

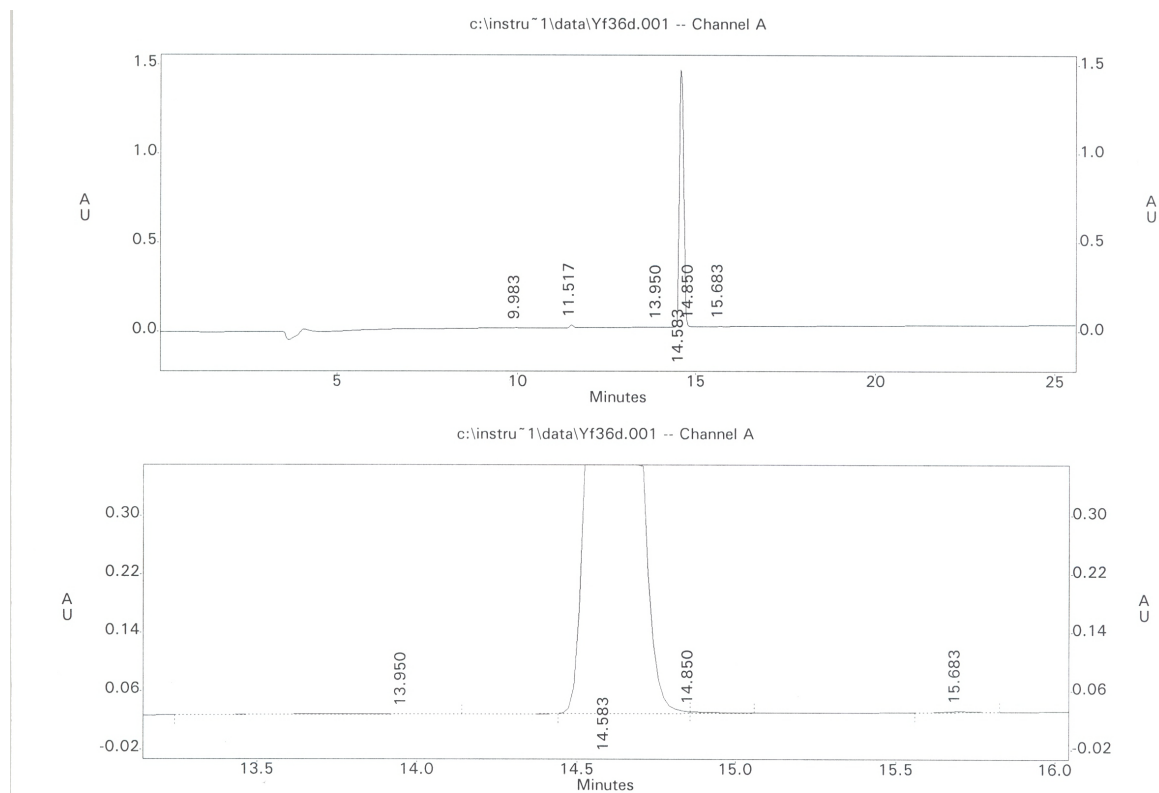

**Fig. 21. HPLC of compound 11(S)**

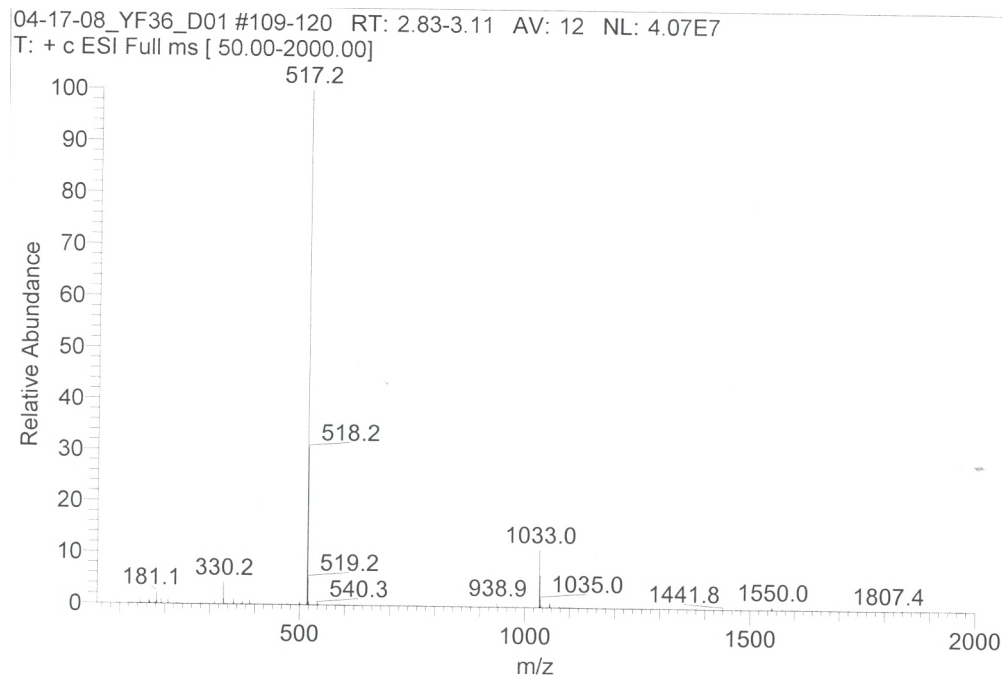

**Fig. 22. Mass spectrum of compound 11(S)**

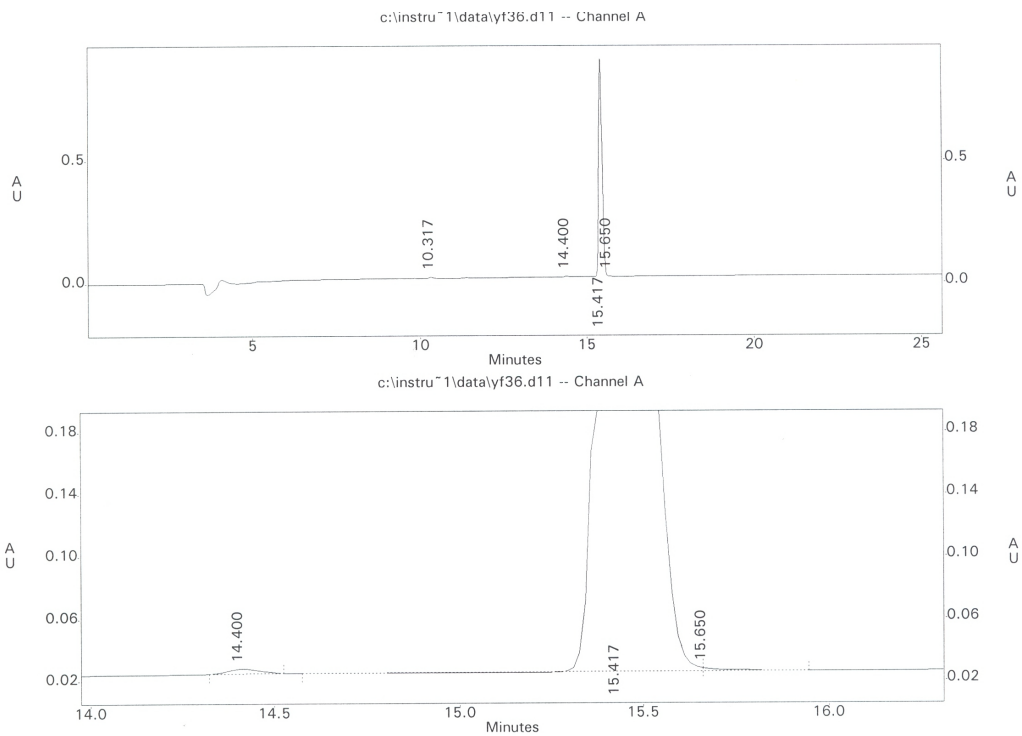

**Fig. 23. HPLC of compound 11(R)**

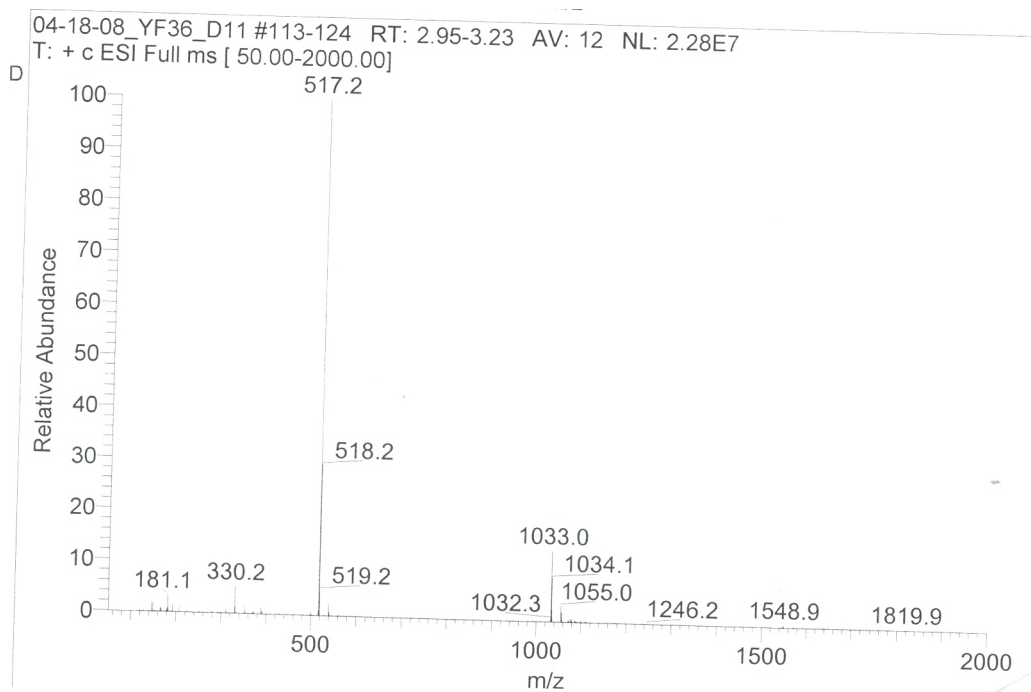

**Fig. 24. Mass spectrum of compound 11(R)**

Volume : 5ul

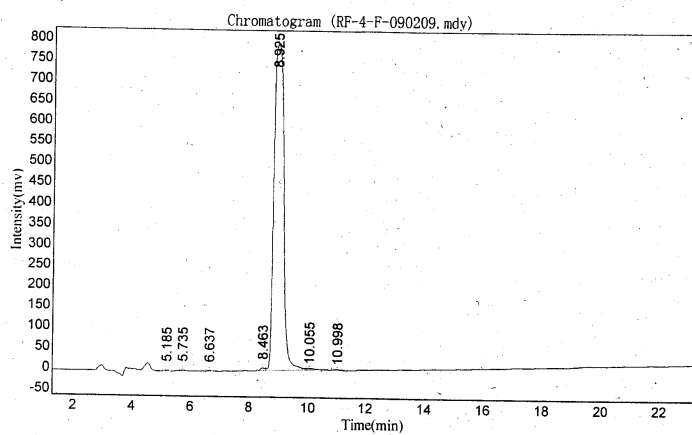

**Results**

| Peak No. | Peak ID | Ret Time | Height     | Area         | Conc.    |
|----------|---------|----------|------------|--------------|----------|
| 1        |         | 5.185    | 2034.454   | 17105.600    | 0.0927   |
| 2        |         | 5.735    | 2000.000   | 15728.002    | 0.0852   |
| 3        |         | 6.637    | 2024.648   | 16143.999    | 0.0875   |
| 4        |         | 8.463    | 6112.589   | 65516.766    | 0.3551   |
| 5        |         | 8.925    | 790578.125 | 18260086.000 | 98.9634  |
| 6        |         | 10.055   | 3074.224   | 55562.207    | 0.3011   |
| 7        |         | 10.998   | 1644.108   | 21216.004    | 0.1150   |
| Total    |         |          | 807468.148 | 18451358.577 | 100.0000 |

**Fig. 25. HPLC of compound 12(S)**

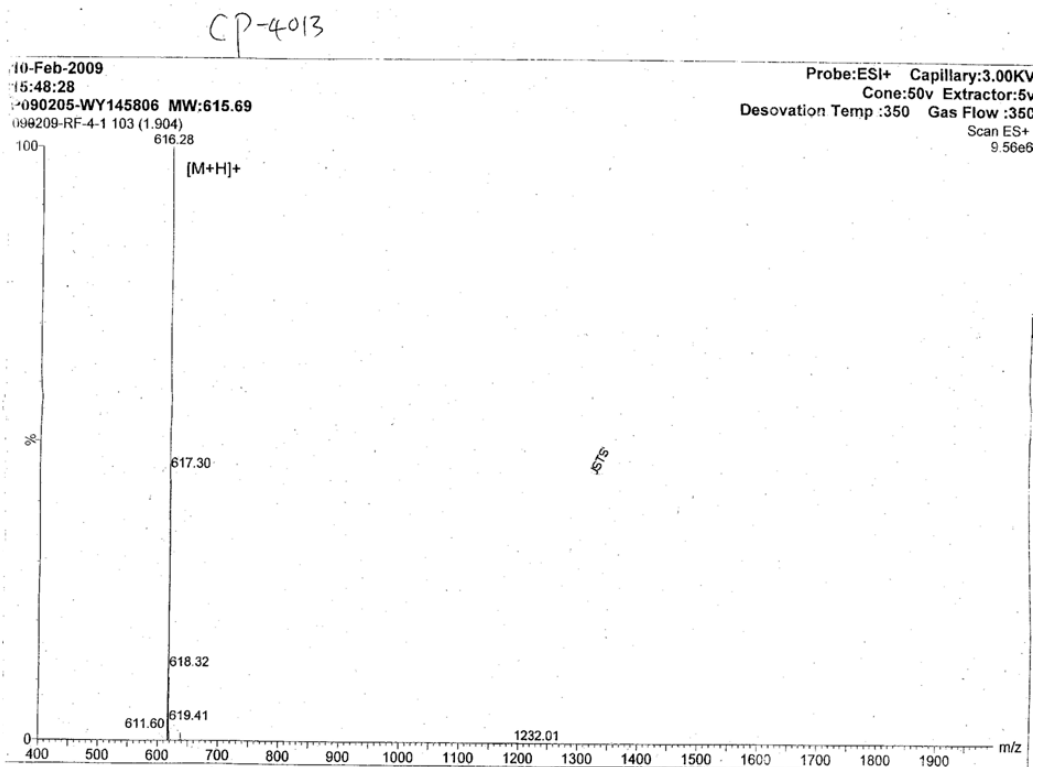

Fig. 26. Mass spectrum of compound 12(S)

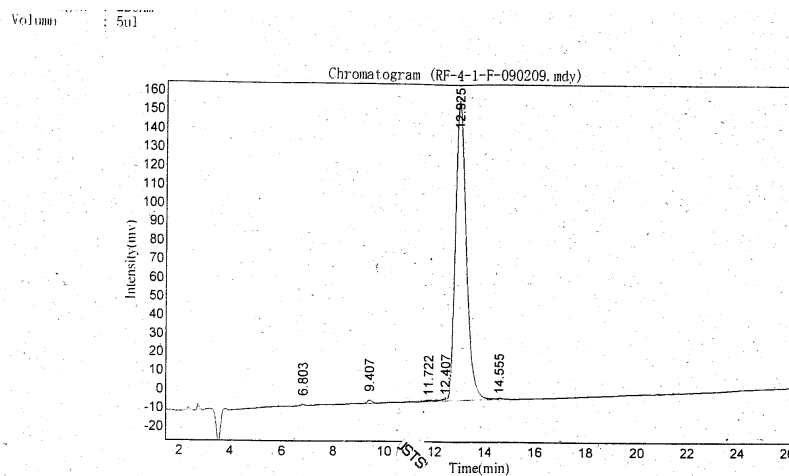

**Results**

| Peak No. | Peak ID | Ret Time | Height     | Area        | Conc.    |
|----------|---------|----------|------------|-------------|----------|
| 1        |         | 6.803    | 748.351    | 6118.394    | 0.1226   |
| 2        |         | 9.407    | 1827.459   | 21246.398   | 0.4258   |
| 3        |         | 11.722   | 661.096    | 14848.227   | 0.2976   |
| 4        |         | 12.407   | 1094.085   | 15201.640   | 0.3046   |
| 5        |         | 12.925   | 161319.844 | 4917201.000 | 98.5390  |
| 6        |         | 14.555   | 554.265    | 15493.111   | 0.3105   |
| Total    |         |          | 166205.100 | 4990108.770 | 100.0000 |

Fig. 27. HPLC of compound 12(R)

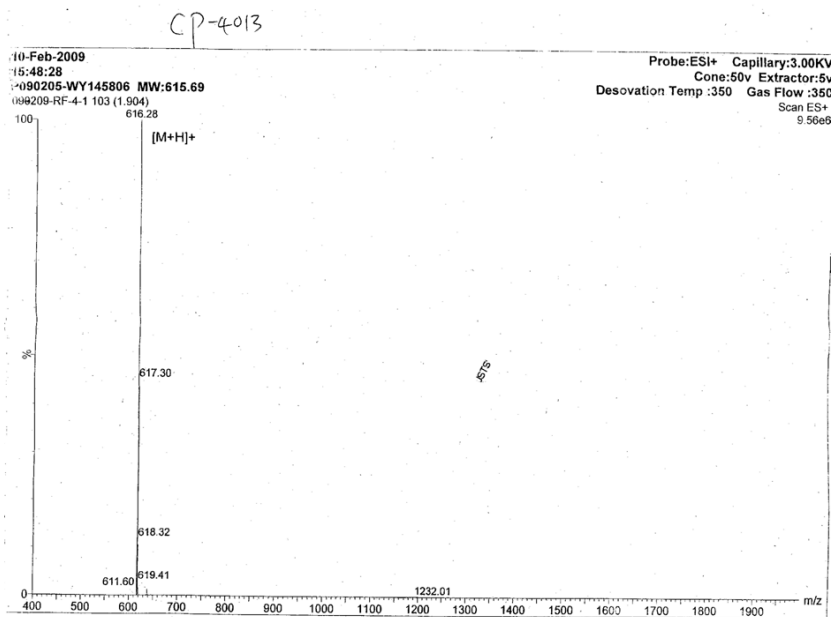

**Fig. 28. Mass spectrum of compound 12(R)**

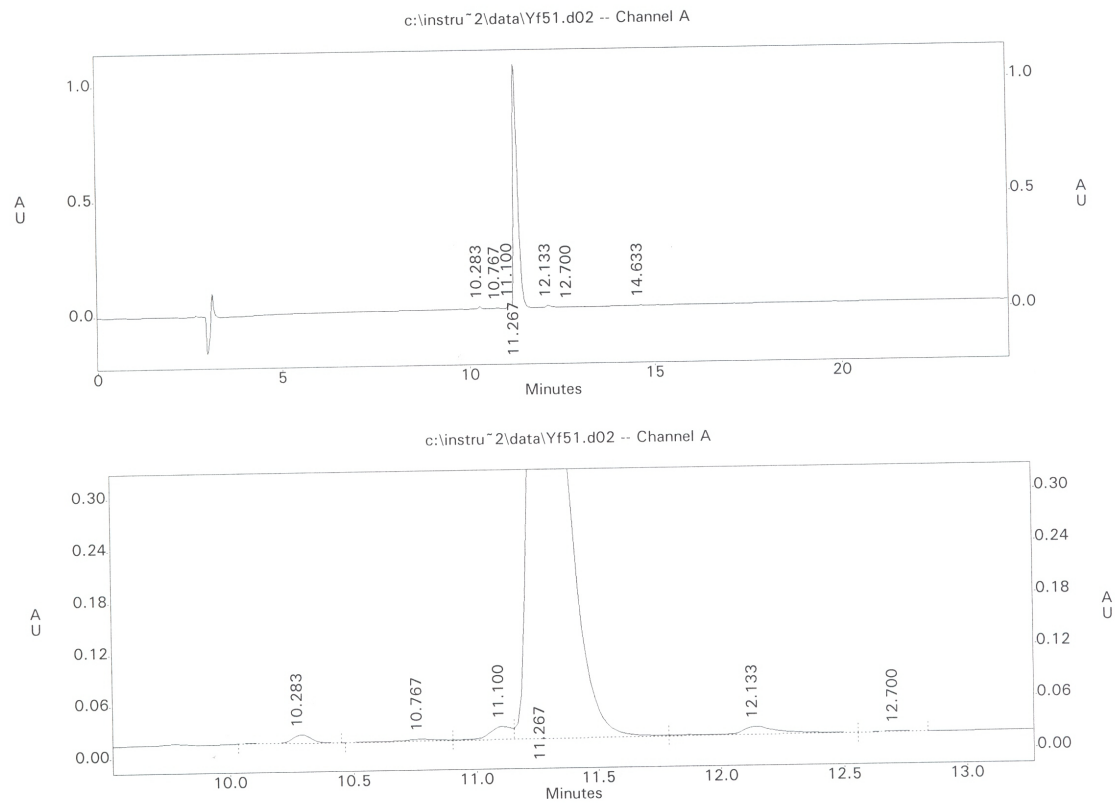

**Fig. 29. HPLC of compound 13(S)**

06-03-08\_YF51\_01 #92-99 RT: 2.34-2.52 AV: 8 NL: 4.26E6  
T: + c ESI Full ms [ 50.00-2000.00]

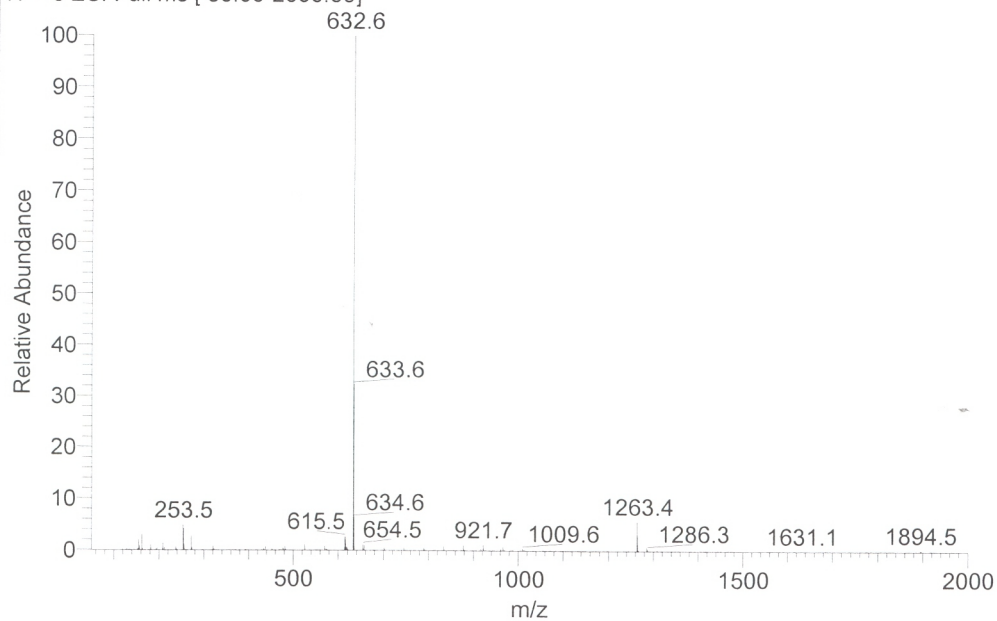

**Fig. 30. Mass spectrum of compound 13(S)**

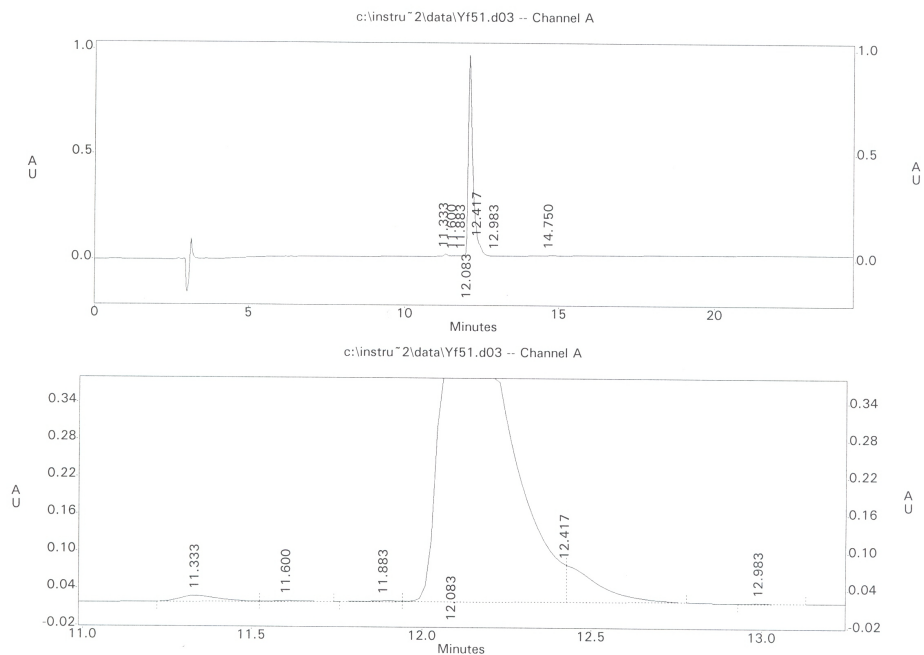

**Fig. 31. HPLC of compound 13(R)**

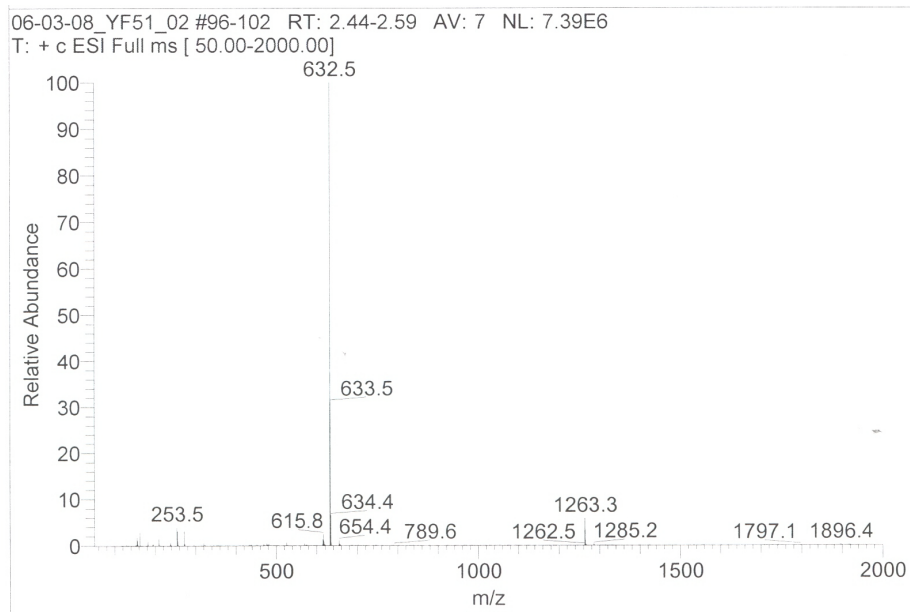

**Fig. 32. Mass spectrum of compound 13(R)**



File opened: E:\RF-4(C)-F-091013.hw, where

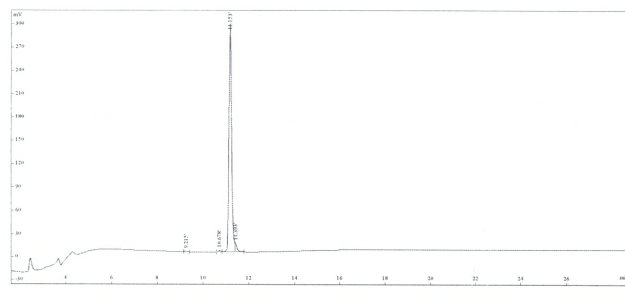

**Fig. 33. HPLC of compound 14(S)**

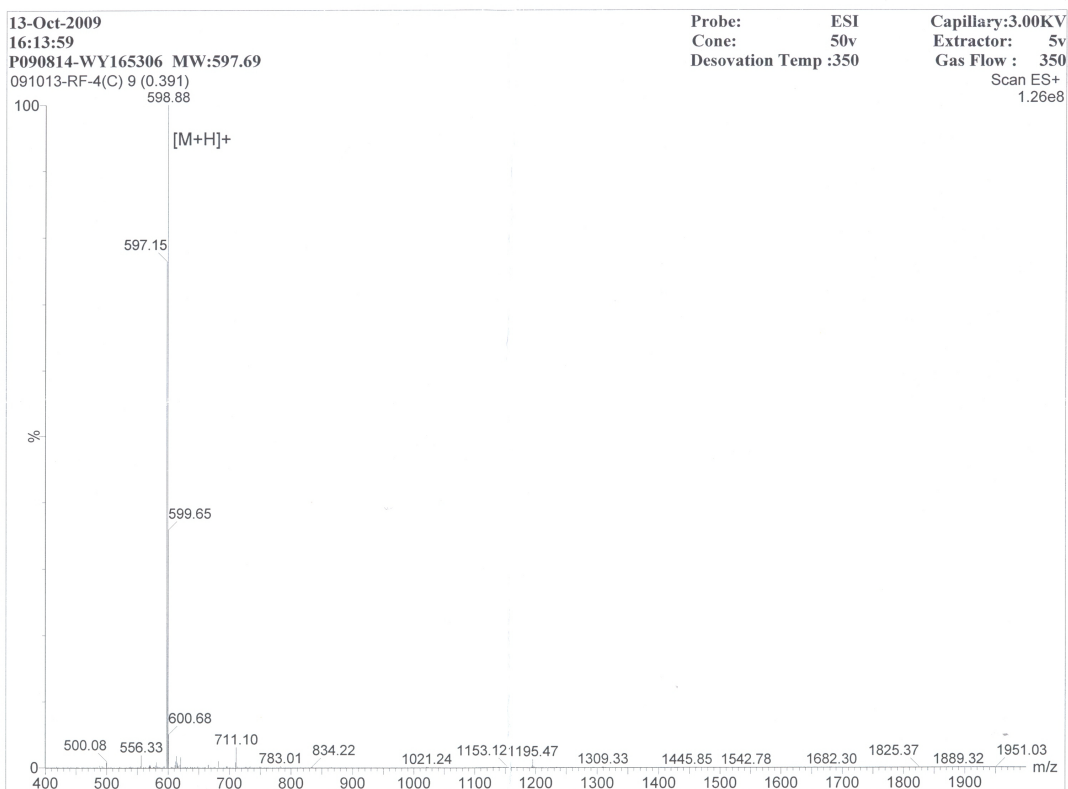

**Fig. 34. Mass spectrum of compound 14(S)**

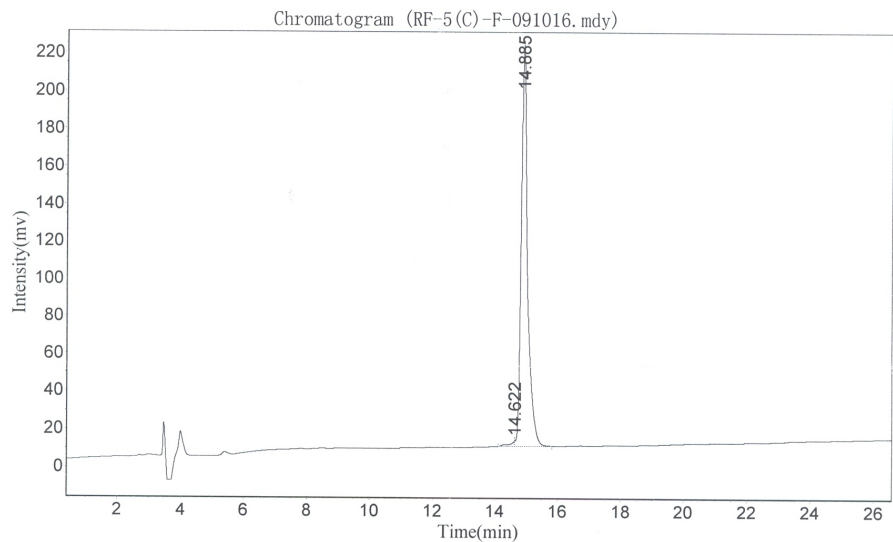

**Fig. 35. HPLC of compound 15(S)**

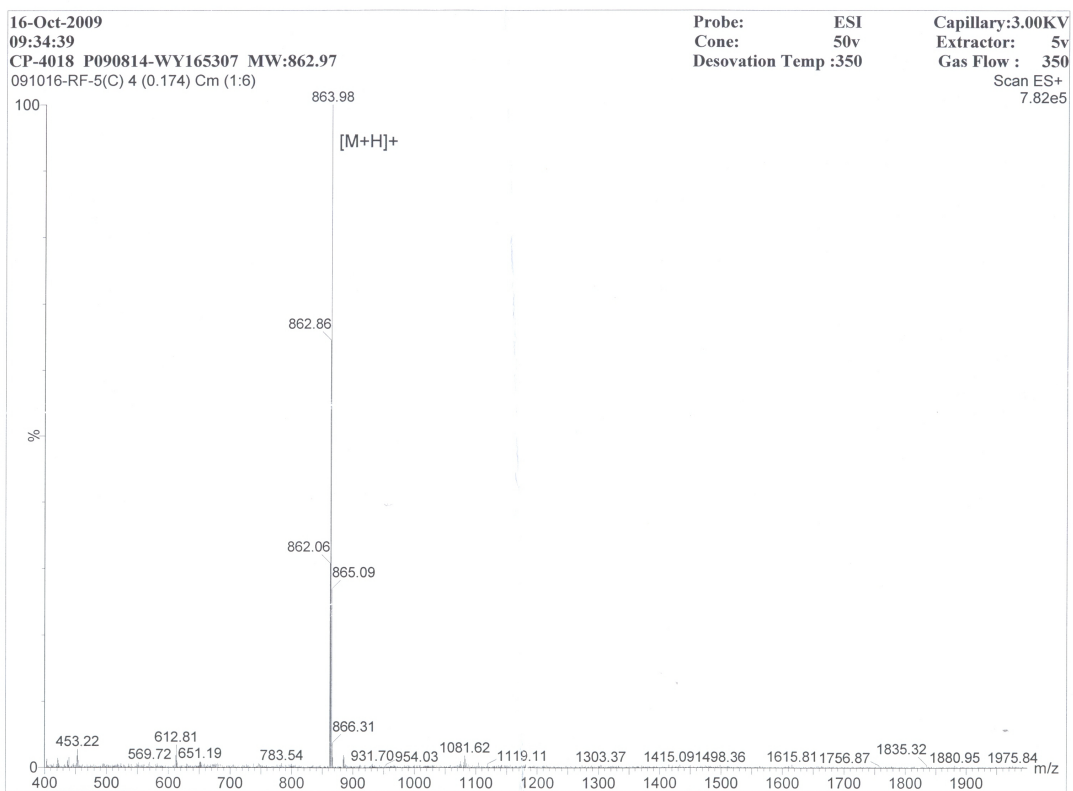

**Fig. 36. Mass Spectrum of 15(S)**

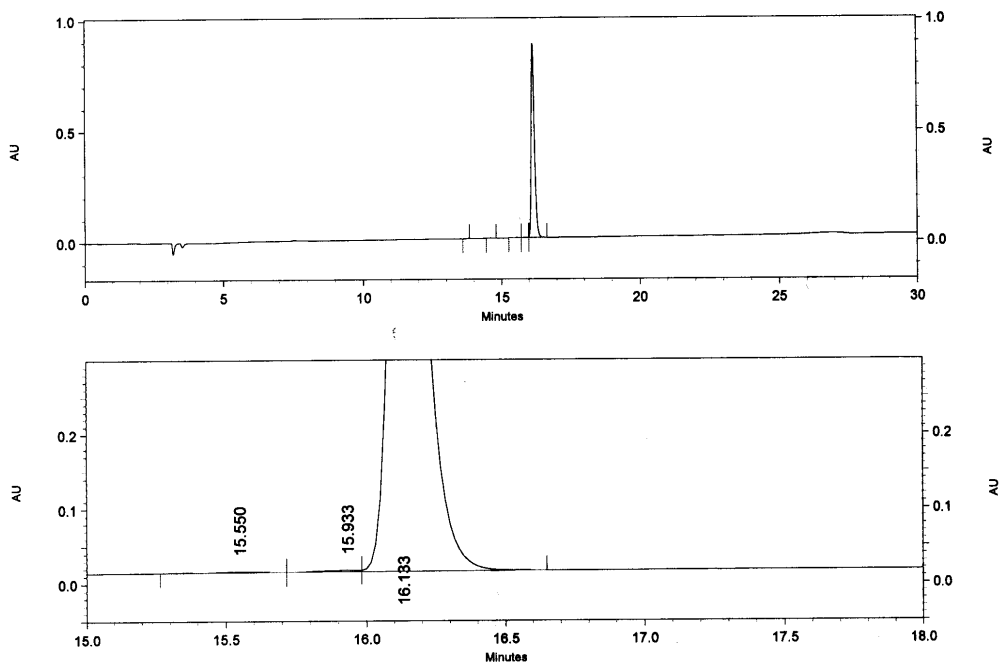

Det 166

**Fig. 37. HPLC of compound 16(S)**

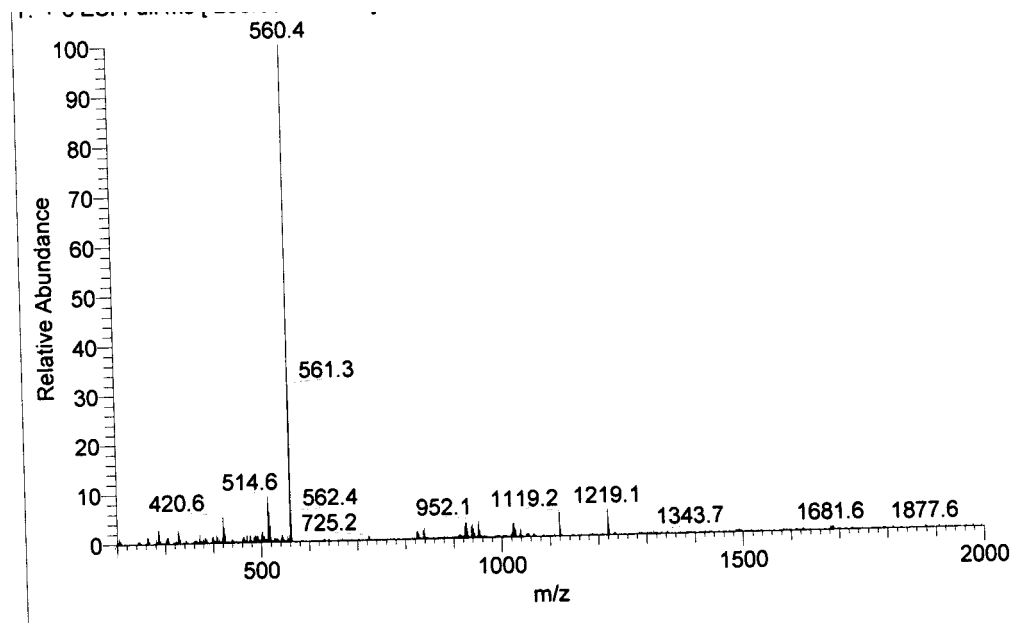

**Fig. 38. Mass Spec of compound 16(S)**

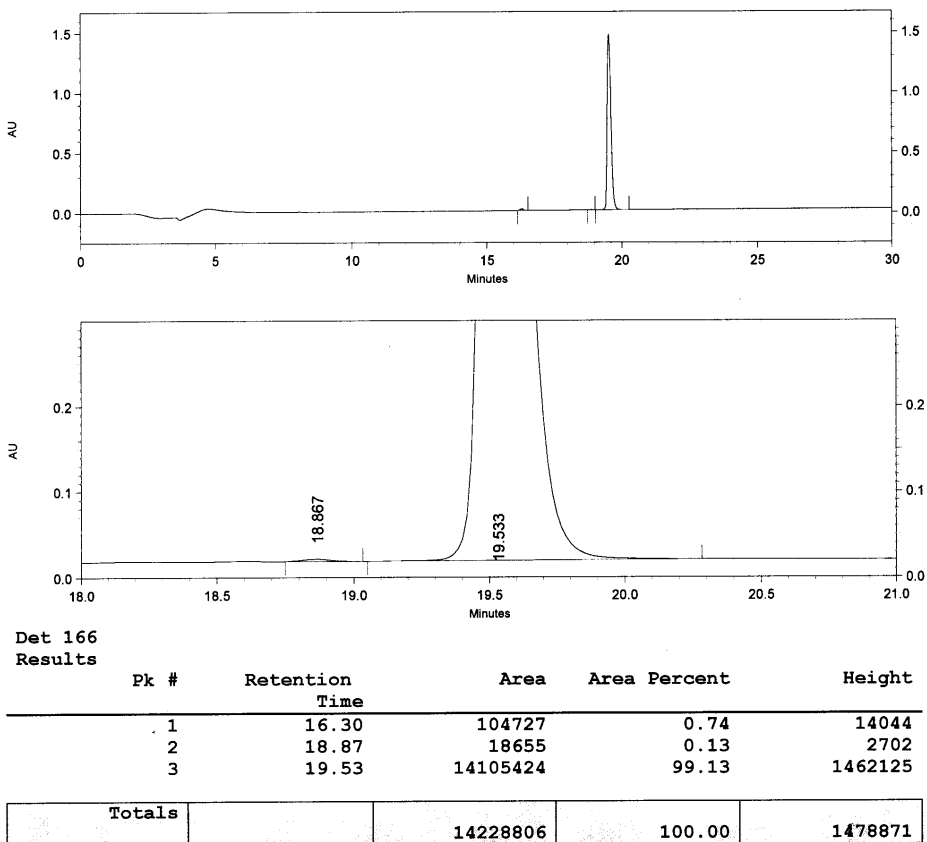

Fig. 39. HPLC of compound 16(R)

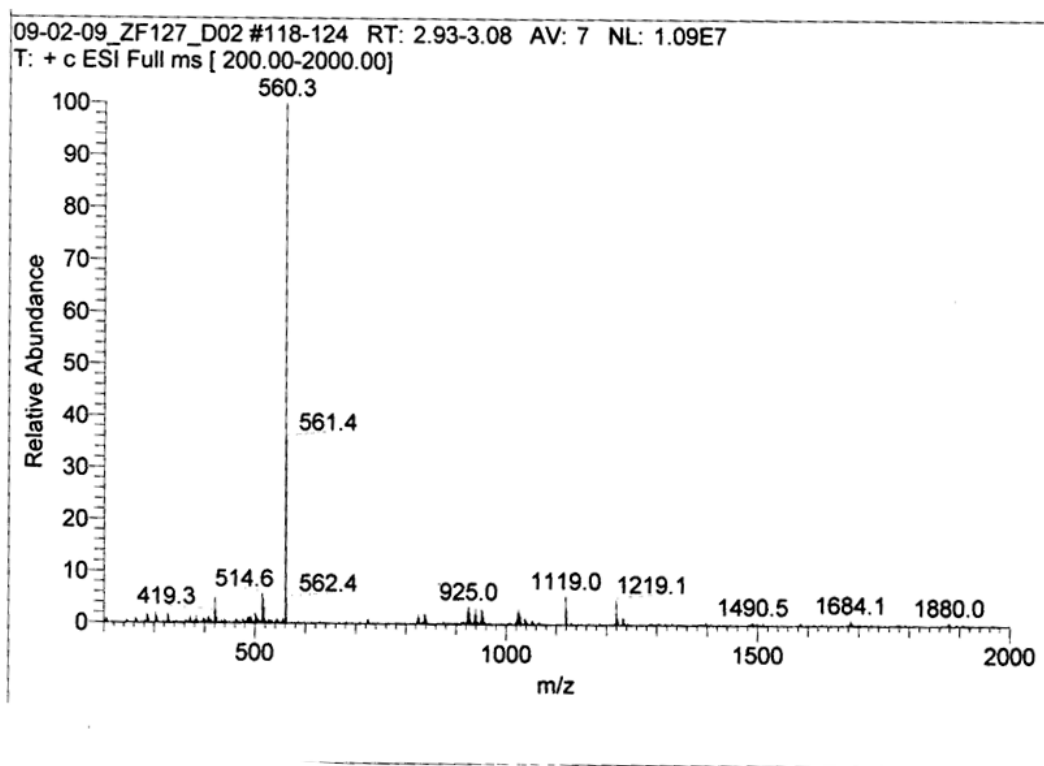

Fig. 40. Mass spectrum compound 16(R)

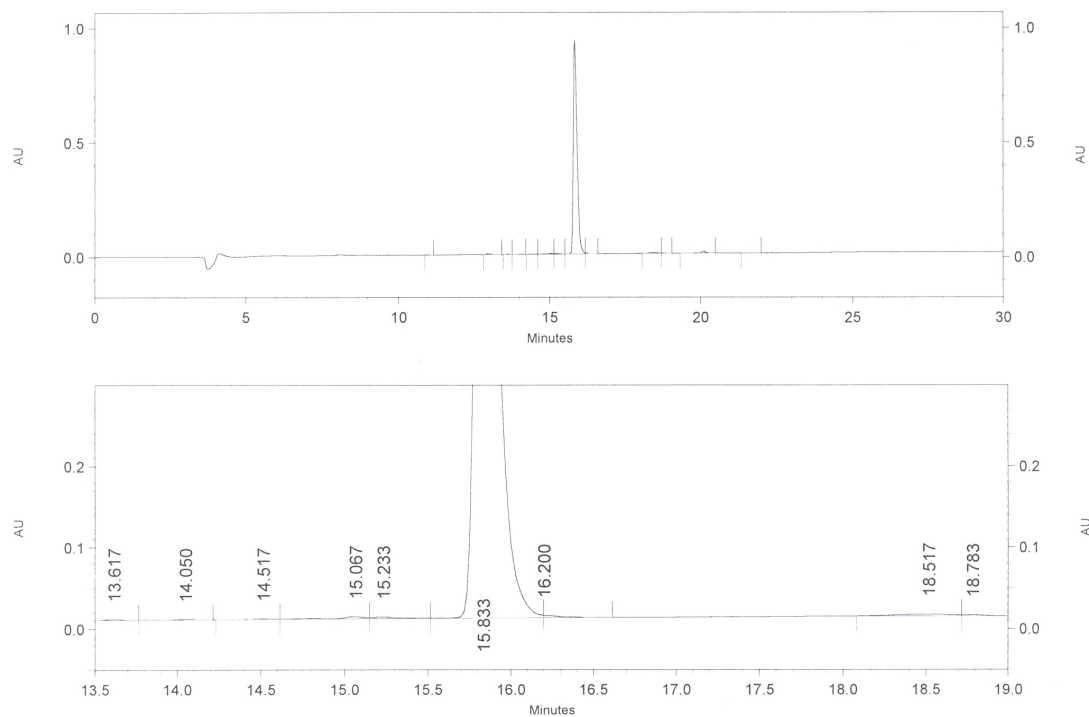

**Fig. 41. HPLC of compound 17(S)**

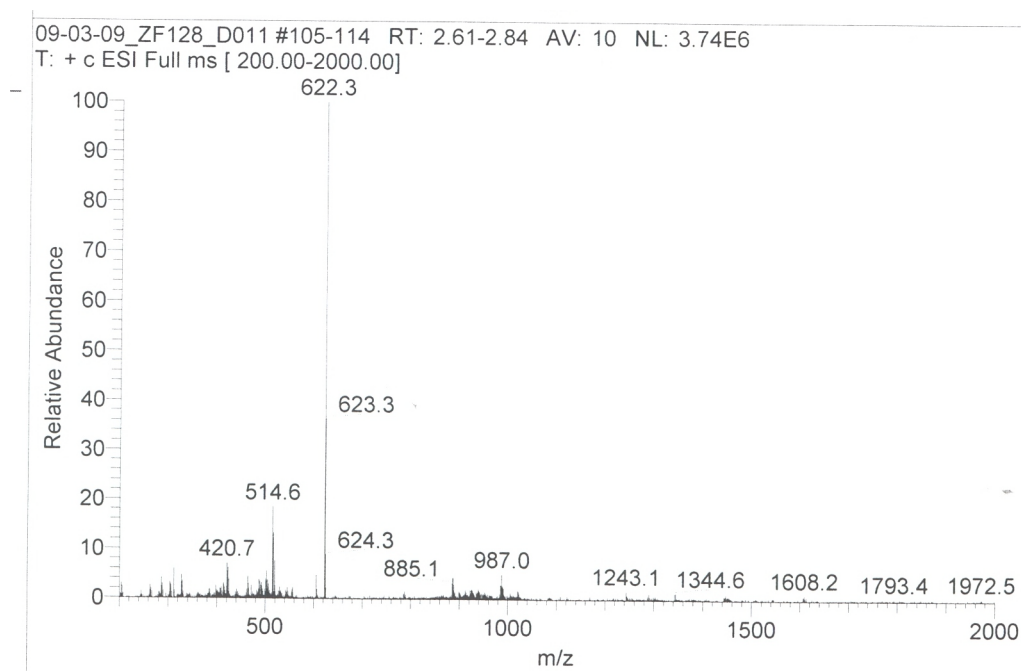

**Fig. 42. Mass spectrum of 17(S)**

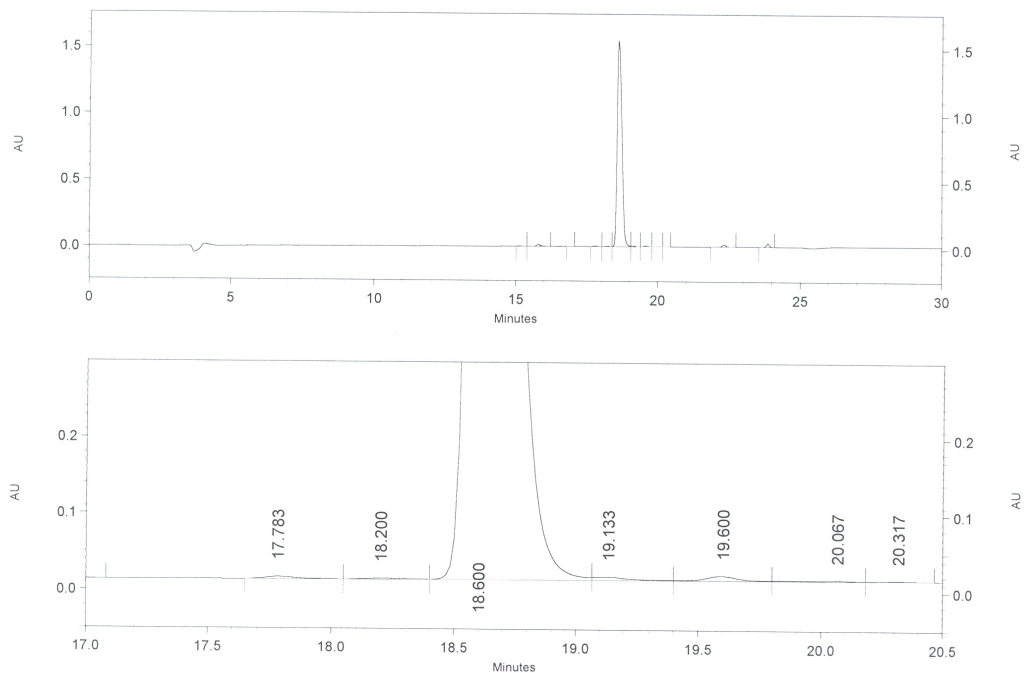

**Fig. 43. HPLC of compound 17(R)**

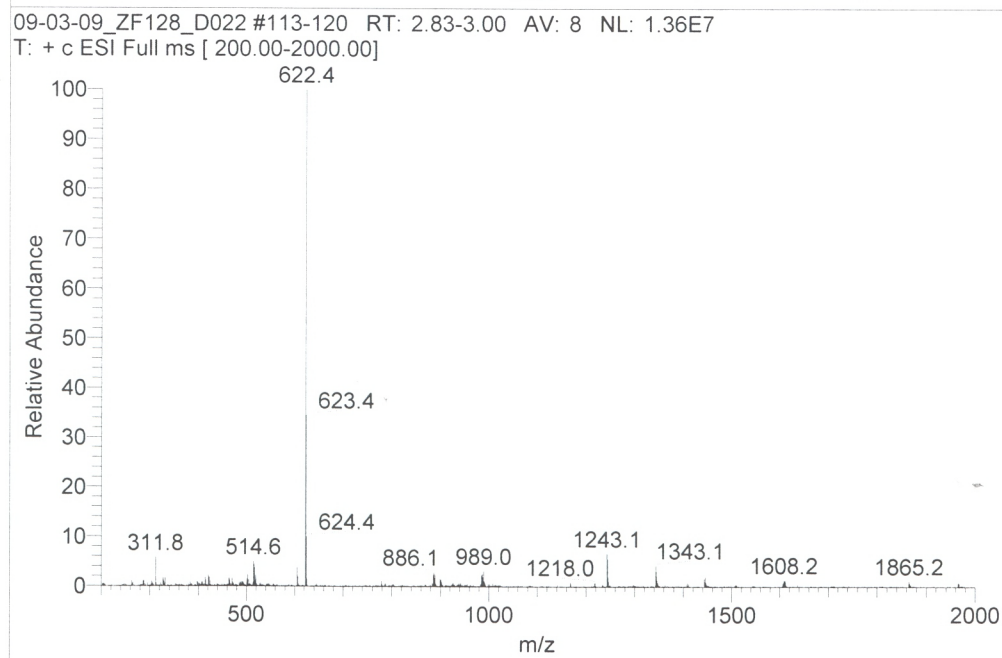

**Fig. 44. Mass spectrum 17(R)**

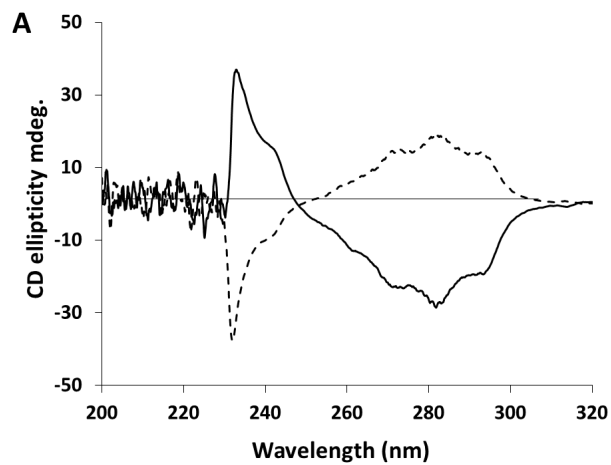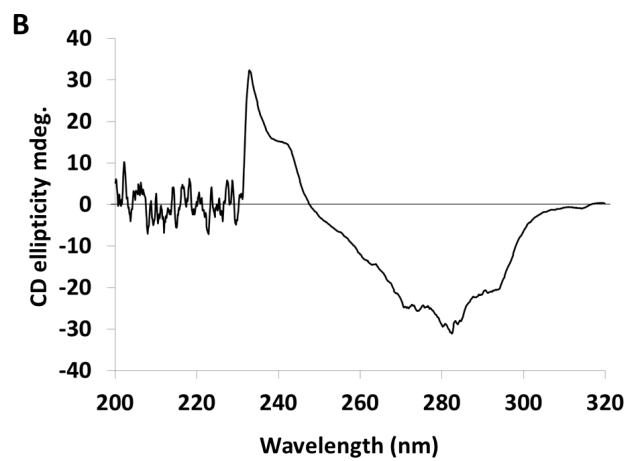



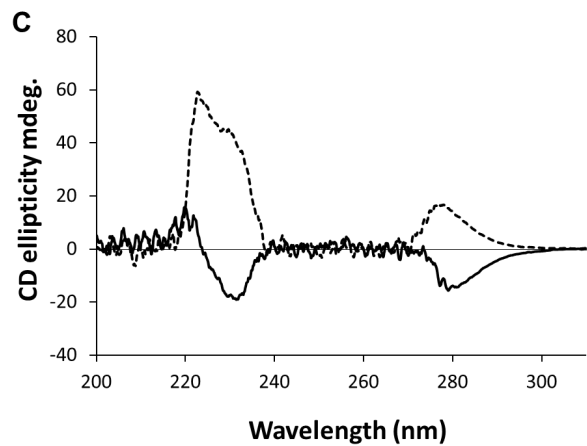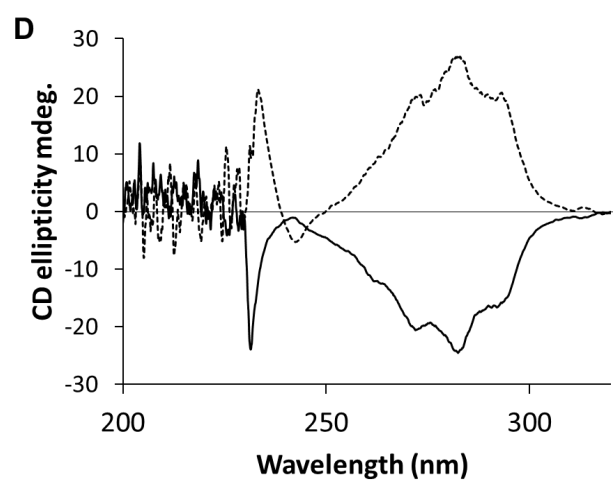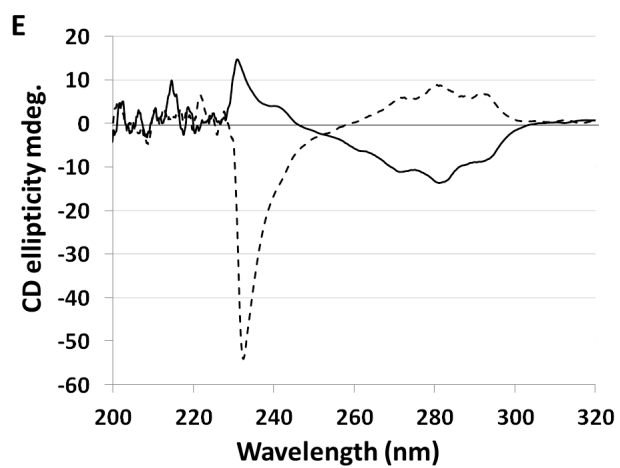

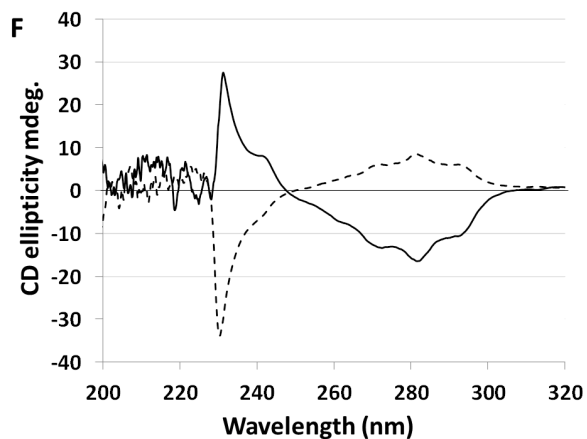

**Fig. 45.** CD spectra of compound **5** and its analogs in water. For synthesis of compounds **5**, **9**, **14** and **15**  $\beta$ -amino acid used had *S* chirality. For other compounds described in this report,  $\beta$ -amino acid used was a racemic mixture. During purification by HPLC, the epimers could be separated. Chirality of the epimers was identified by CD spectra. For reference CD spectra of compound **5** was used. A) compound **5**, solid line represents the spectra of compound with *S* chirality at  $\beta$ -amino acid. Dashed line represents CD spectra of compound **5** with *R* chirality at  $\beta$ -amino acid. B) compound **9(S)**, C) compounds **10(S)** and **10(R)**, D) **12(S)** and **12(R)**, E) **16(S)** and **16(R)** F) **17(S)** and **17(R)**. Dashed lines represent compounds with *R* configuration at the  $\beta$ -amino acid.

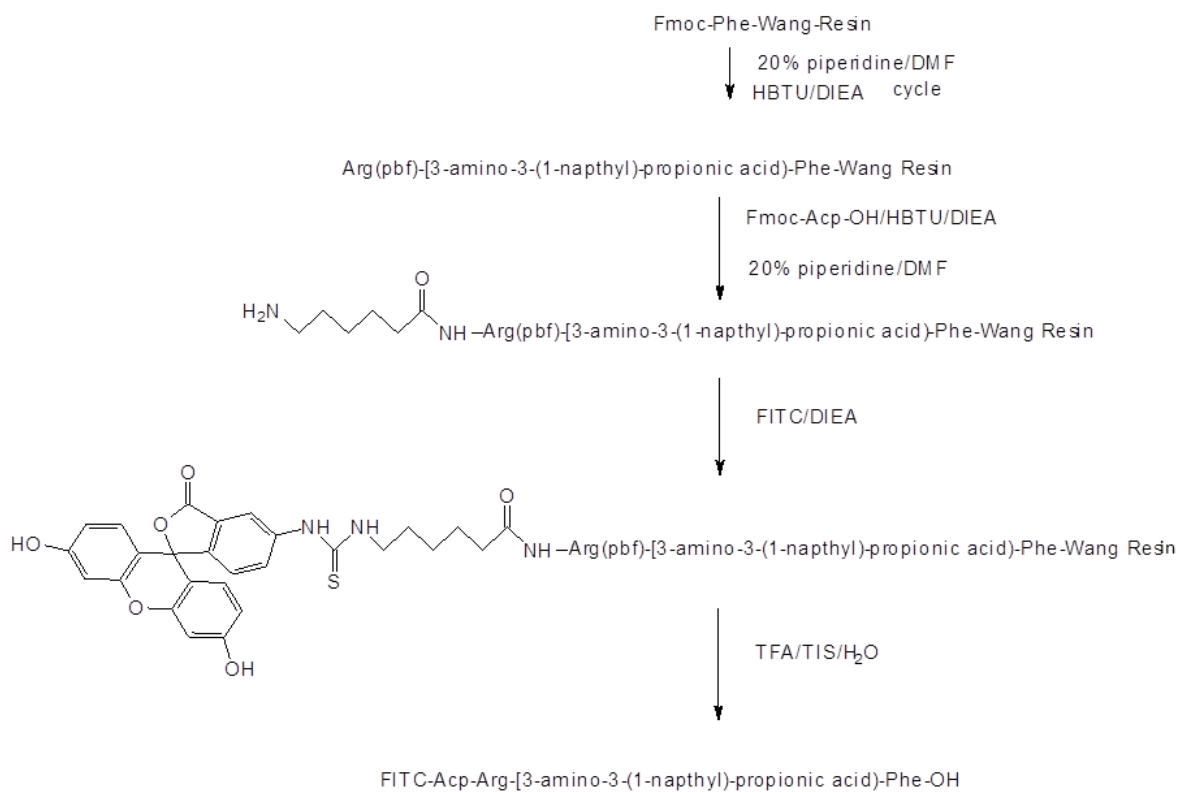

**Fig. 46.** Schematic diagram of synthesis of FITC-5. Amino acids used had L-chirality.
